1           **TRPC3 is essential for functional heterogeneity of**  
2                                           **cerebellar Purkinje cells**

3  
4   **Bin Wu<sup>1</sup>, Francois G.C. Blot<sup>1</sup>, Aaron B. Wong<sup>1</sup>, Catarina Osório<sup>1</sup>, Youri Adolfs<sup>2</sup>, R.**  
5   **Jeroen Pasterkamp<sup>2</sup>, Jana Hartmann<sup>3</sup>, Esther B. E. Becker<sup>4</sup>, Henk-Jan Boele<sup>1</sup>, Chris I.**  
6   **De Zeeuw<sup>1,5</sup> and Martijn Schonewille<sup>1\*</sup>**

7  
8   <sup>1</sup> Department of Neuroscience, Erasmus Medical Center, 3015CN, Rotterdam, the Netherlands

9   <sup>2</sup> Department of Translational Neuroscience, University Medical Center Utrecht, Utrecht  
10   University, 3584 CG, Utrecht, the Netherlands

11   <sup>3</sup> Institute of Neuroscience, Technical University Munich, Munich, Germany

12   <sup>4</sup> Department of Physiology, Anatomy and Genetics, University of Oxford, Oxford, UK

13   <sup>5</sup> Netherlands Institute for Neuroscience, Royal Dutch Academy for Arts and Sciences, 1105  
14   CA, Amsterdam , the Netherlands

15

16   \* Correspondence: Martijn Schonewille

17

18   Postal address: Wytemaweg 80, 3015 CN, Rotterdam, the Netherlands

19   Telephone: +31 107038095

20   Fax: +31 107044734

21   Email: [m.schonewille@erasmusmc.nl](mailto:m.schonewille@erasmusmc.nl)

22

## 23 Abstract

24 Despite the canonical homogenous character of its organization, the cerebellum plays  
25 differential computational roles in distinct types of sensorimotor behaviors. However, the  
26 molecular and cell physiological underpinnings are unclear. Here we determined the  
27 contribution of transient receptor potential cation channel type C3 (TRPC3) to signal  
28 processing in different cerebellar modules. Using gain-of-function and loss-of-function mouse  
29 models, we found that TRPC3 controls the simple spike activity of zebrin-negative ( $Z^-$ ), but  
30 not of zebrin-positive ( $Z^+$ ), Purkinje cells. Moreover, *in vivo* TRPC3 also regulated complex  
31 spike firing and its interaction with simple spikes exclusively in  $Z^-$  Purkinje cells. Finally, we  
32 found that eyeblink conditioning, related to  $Z^-$  modules, but not compensatory eye movement  
33 adaptation, linked to  $Z^+$  modules, was affected in TRPC3 loss-of-function mice. Together, our  
34 results indicate that TRPC3 is essential for the cellular heterogeneity that introduces distinct  
35 physiological properties in an otherwise homogeneous population of Purkinje cells, conjuring  
36 functional heterogeneity in cerebellar sensorimotor integration.

37

## 38 Introduction

39 Maintaining correct sensorimotor integration relies on rapid modifications of activity. The  
40 cerebellum is instrumental herein, evidenced by the fact that disruptions of cerebellar  
41 functioning, e.g. through stroke or neurodegenerative disorders, affect coordination and  
42 adaption of many types of behaviors such as gait, eye movements and speech<sup>1,2</sup>. The palette of  
43 behavioral parameters controlled by the cerebellum is also broad and includes features like  
44 timing<sup>3-5</sup>, strength<sup>6,7</sup> as well as coordination<sup>8,9</sup> of muscle activity. However, the pluriformity of  
45 behavioral features does not match with the homogeneity of the structure and  
46 cyto-architecture of the cerebellar cortex.

47 Recently, it has been uncovered that the sole output neurons of the cerebellar cortex, the  
48 Purkinje cells (PCs), can be divided into two main groups with a distinct firing behavior<sup>10,11</sup>.  
49 One group, consisting of PCs that are positive for the glycolytic enzyme aldolase C, also  
50 referred to as zebrin II<sup>12,13</sup>, shows relatively low simple spike firing rates, whereas the PCs in  
51 the other group that form zebrin-negative zones, fire at higher rates<sup>10</sup>. Zebrin II demarcates  
52 olivocerebellar modules, anatomically defined operational units each consisting of a closed  
53 loop between the inferior olive, parasagittal bands of the cerebellar cortex and the cerebellar  
54 nuclei<sup>14,15</sup>. Given that different motor domains are controlled by specific olivocerebellar  
55 modules<sup>14,16</sup>, the differential intrinsic firing frequencies may be tuned to the specific neuronal  
56 demands downstream of the cerebellum<sup>17</sup>. Thus, dependent on the specific behavior  
57 controlled by the module involved, the PCs engaged may show low or high intrinsic firing as  
58 well as related plasticity rules to adjust these behaviors.

59 Cellular heterogeneity can drive differentiation in the activity and plasticity of individual  
60 cells that operate within a larger ensemble<sup>18</sup>. The molecular and cellular determinants of  
61 differential electrophysiological processing in the cerebellar PC modules are just starting to be  
62 identified<sup>19,20</sup>. For example, while the impact of zebrin II itself is still unclear<sup>10</sup>, excitatory  
63 amino acid transporter 4 (EAAT4) and GLAST/EAAT1 can directly modulate simple spike  
64 activity of PCs as well as plasticity of their parallel fiber inputs in a zone specific manner<sup>21,22</sup>.

65 Likewise, phospholipase C subtype  $\beta 4$  (PLC $\beta 4$ ) is required for climbing fiber elimination and  
66 PF-PC LTD through mGluR1 activation by spill-over glutamate and is only expressed in  
67 zebrin-negative modules<sup>23-25</sup>. The alpha isoform of mGluR1 (mGluR1a) is responsible for  
68 PLC $\beta 4$  activation and is uniformly expressed in cerebellar PCs<sup>26</sup>. Conversely, the mGluR1b  
69 receptor is expressed in a pattern complementary to that of zebrin<sup>27</sup>, but it is less clear to what  
70 extent mGluR1b may affect PCs.

71 Given that mGluR1b interacts with TRPC3 to drive mGluR1-dependent currents<sup>28</sup>, we set  
72 out to test the hypothesis that TRPC3 is a key player in the molecular machinery responsible  
73 for differential control over PC activity and function. We demonstrate that TRPC3 in the brain  
74 has particularly strong expression in the cerebellum, in a pattern complementary to zebrin in  
75 the vermis and more uniform in the hemispheres. We examined the impact of TRPC3  
76 gain-of-function and loss-of-function mutations and found effects on the spiking rate of Z-  
77 but not Z+ PCs *in vitro*. *In vivo* recordings during quiet wakefulness in the same mutants  
78 revealed that the level of TRPC3 influences both simple spike and complex spike rates, and  
79 the interaction between the two, also selectively in Z- modules. Finally, we show that  
80 adaptation of compensatory eye movements, which is controlled by Z+-modules in the  
81 vestibulocerebellum<sup>10,29</sup>, is not affected by the loss of TRPC3 function, whereas the learning  
82 rate during eyeblink conditioning, which is linked to the Z- modules<sup>30,31</sup>, is decreased after  
83 PC-specific ablation of TRPC3, highlighting the behavioral relevance of firing rate  
84 modulation by TRPC3.

85

## 86 Results

### 87 Specific expression pattern and subcellular localization of TRPC3 in the mouse brain

88 The expression of TRPC3 and how it relates to that of zebrin in the adult mammalian brain  
89 is unclear, in part due to poor antibody quality. Using a novel TRPC3-specific antibody  
90 (Cell signaling, #77934), we examined the immunohistochemistry of TRPC3. We found  
91 that in the mouse brain TRPC3 is most prominently expressed in the cerebellum (**Fig. 1a**),  
92 specifically in PCs and unipolar brush cells (UBCs) (**Fig. 1b**). However, upon further scrutiny,  
93 it is clear that, although expressed in all PCs, endogenous TRPC3 does not distribute  
94 homogeneously. TRPC3 expresses in a pattern that in the vermis complements that of zebrin,  
95 while in the hemispheres it appears more uniform (**Fig. 1b-c, Supplementary Fig. 1, 2**).  
96 Specifically, the TRPC3 level, in the anterior cerebellum (referred to as lobules I-III),  
97 where the PCs are predominantly Z<sup>-</sup>, is quite intense; while less so in the posterior PCs  
98 (referred to as lobule X), which are primarily Z<sup>+</sup> (**Supplementary Fig. 2a-b**). Although  
99 clearly observable in our standard immunohistochemistry, this pattern was visualized in a  
100 more comprehensive manner using whole-mount brain light sheet imaging. The antibody  
101 staining appears to be of better quality in the iDISCO protocol. The lens and resolution of the  
102 light sheet also circumvent stitching artefacts resulting from a tile scanning of the confocal  
103 microscope by imaging the full cerebellum in one single scanning window (**Supplementary**  
104 **Movie**). The anterior and posterior differences of the protein amount were confirmed by  
105 western blot analysis (**Supplementary Fig. 3a-b**).

106 Our immunohistochemical imaging reveals that TRPC3 is present in the soma and  
107 dendritic arbor of PCs (**Fig. 1b, Supplementary Fig. 2a-b**), to further examine the  
108 subcellular localization of TRPC3 in the cerebellum, we performed immunoblots of  
109 isolated fractions following a synaptic protein extraction procedure (**Supplementary Fig.**  
110 **3c**). As expected, TRPC3, a channel protein, is abundantly present in the membrane and  
111 almost completely absent in the cytosol (**Supplementary Fig. 3d**). Moreover, TRPC3 is  
112 enriched in synapstosomes (**Supplementary Fig. 3d**), in line with the common conception

113 of mGluR1b-dependent activation<sup>26,28</sup>. Together, these results indicate that, within the brain,  
114 strong TRPC3 expression is restricted to the cerebellum, where it is present in all PCs and  
115 UBCs, but at particularly high levels in Z- PCs.

116

### 117 **TRPC3 differentially controls the physiological properties of PCs *in vitro***

118 Next, we investigated the contribution of TRPC3 to cerebellar function in Z+ and Z- PCs  
119 using both loss-of-function and gain-of-function mouse models (**Fig. 2a**).  
120 TRPC3-Moonwalker (TRPC3<sup>Mwk</sup>) mice harbor a point mutation resulting in TRPC3  
121 gain-of-function through increased Ca<sup>2+</sup> influx upon activation<sup>32</sup>. Inversely, TRPC3 was  
122 selectively ablated from cerebellar PCs by crossing mice carrying *loxP*-flanked TRPC3  
123 alleles<sup>28</sup> with L7-Cre (*PCP2-Cre*)<sup>33</sup> mice, generating L7-TRPC3<sup>KO</sup> mice. Western blotting  
124 and immunostaining of the anterior (Z-) and the posterior (Z+) cerebellar cortex of  
125 L7-TRPC3<sup>KO</sup> mice confirmed that protein levels are reduced (**Supplementary Fig. 3, 4**). The  
126 loss of TRPC3 was specific for cerebellar PCs, as TRPC3 expression in UBCs was not  
127 affected (**Supplementary Fig. 4b**, white arrow heads).

128 PCs are intrinsically active pace-making neurons, which fire regular action potentials even  
129 when deprived of synaptic inputs<sup>34,35</sup>. To determine the contribution of TRPC3 to the activity  
130 of Z+ and Z- PCs, we performed *in vitro* electrophysiological recordings on sagittal sections  
131 of adult mice of both mutants (**Fig. 2b**), taking lobules X and I-III as proxies for Z+ and Z-  
132 PC modules, respectively (see ref.<sup>10,15</sup>). In littermate controls, the intrinsic firing rate of Z-  
133 PCs is higher than that of Z+ PCs, confirming previous results<sup>10</sup>. Gain-of-function TRPC3<sup>Mwk</sup>  
134 mice showed a decrease in inter spike intervals (ISI) and an increase in PC simple spike firing  
135 rate selectively in Z- PCs, without affecting Z+ PCs (**Fig. 2c**). Inversely, ablating TRPC3  
136 from PCs caused an increase in ISI and decrease in firing rate in Z- PCs, again without  
137 affecting Z+ PCs (**Fig. 2d**). We also assessed the regularity of firing activities by measuring  
138 the coefficient of variation (CV) and the coefficient of variation of adjacent intervals (CV2)  
139 of ISI. Both the CV and CV2 of Z- PCs in lobules I-III declined significantly in  
140 L7-TRPC3<sup>KO</sup> mice, while remaining unchanged in TRPC3<sup>Mwk</sup> mice; in contrast, in Z+

141 lobule X, none of these parameters were altered in either TRPC3<sup>Mwk</sup> or L7-TRPC3<sup>KO</sup> mice  
142 (**Supplementary Fig. 5**).

143 To verify the effect of TRPC3 deletion on other cell physiological properties of PCs, we  
144 performed whole-cell patch-clamp recordings in a subset of PCs. Injections of current steps  
145 into PCs evoked increasing numbers of action potential, in the presence of blockers for both  
146 excitatory and inhibitory synaptic inputs. In line with the cell-attached recordings, in  
147 loss-of-function L7-TRPC3<sup>KO</sup> mice, PC intrinsic excitability, quantified by the slope of  
148 firing rate versus current injection curve, was significantly reduced in lobules I-III, but  
149 unchanged in lobule X, compared with those of littermate controls (**Fig. 2e**). Other  
150 physiological parameters in terms of holding current, amplitudes, half-widths and  
151 after-hyperpolarization amplitudes, were not significantly affected in either lobules I-III or  
152 lobule X (**Supplementary Fig. 6**).

153 Together, our *in vitro* recordings from gain- and loss-of-function mutants indicate that  
154 TRPC3 selectively controls the activity in Z- PCs, without affecting excitability or other cell  
155 intrinsic properties. Thus, at least *in vitro*, TRPC3 contributes to the difference in intrinsic  
156 firing activity between Z+ and Z- PCs, by directly controlling the intrinsic excitability of Z-  
157 PCs.

158

### 159 **TRPC3 regulates the activity of simple spikes selectively in Z- PCs *in vivo***

160 To examine the role of TRPC3 in the closed loop, intact cerebellar module, we next  
161 performed PC recordings *in vivo* in adult mice during quiet wakefulness (**Fig. 3a**). PCs could  
162 be identified during extracellular recordings by the presence of complex spikes, while the  
163 consistent presence of a pause in simple spikes following each complex spike confirmed that  
164 the recording was obtained from a single unit<sup>36</sup>. PC recording locations in either Z- lobules  
165 I-III or Z+ lobule X were confirmed with iontophoretic injections of biotinylated dextran  
166 amine (BDA), which could be identified by immunostaining (**Fig. 3b**). As we showed  
167 before<sup>10,37</sup>, PCs in Z- modules fired simple spikes at a higher rate than those in Z+ modules  
168 (**Fig. 3d,f**).

169 *In vivo*, in the presence of physiological inputs the PCs in Z<sup>-</sup> lobules I-III of TRPC3<sup>Mwk</sup>  
170 mutants showed a decreased ISI and increased simple spike firing rate, whereas the Z<sup>+</sup> PCs  
171 were unaffected. Conversely, Z<sup>-</sup> PCs in L7-TRPC3<sup>KO</sup> mutants featured an increased ISI and  
172 decreased simple spike firing rate, but again without changes in PCs of the Z<sup>+</sup> lobule X, all  
173 compared to those of their littermate controls (**Fig. 3c-f**). Unlike *in vitro*, PCs in the  
174 L7-TRPC3<sup>KO</sup> mice showed CV and CV2 comparable to controls for both Z<sup>-</sup> and Z<sup>+</sup> modules  
175 (**Supplementary Fig. 7g-i**). The CV of simple spike ISI was, however, prominently elevated  
176 in both Z<sup>-</sup> and Z<sup>+</sup> modules in TRPC3<sup>Mwk</sup> mutants (**Supplementary Fig. 7a-c**). It should be  
177 noted that PC regularity *in vivo* is largely determined by external inputs (compared  
178 **Supplementary Fig. 5 to 7**), which thereby can offset those intrinsic variations induced by  
179 the mutation of TRPC3. The irregular firing activity of PCs in TRPC3<sup>Mwk</sup> mutants, at least for  
180 Z<sup>+</sup> PCs, may be attributed to impaired function or degeneration of UBCs, while the  
181 physiological synaptic input *in vivo* in L7-TRPC3<sup>KO</sup> mice could obscure the regularity  
182 changes observed *in vitro* in these mice.

183 In short, even *in vivo*, in the presence of all physiological inputs both gain-of-function and  
184 loss-of-function mutations of TRPC3 exclusively affects Z<sup>-</sup> PCs, with the most pronounced,  
185 persistent effect being the mutation-selective influence on simple spike firing rate.

186

### 187 **TRPC3-related effects correlate with zebrin expression and are independent of** 188 **development**

189 Our results so far have identified selective TRPC3-related effects by comparing lobules I-III  
190 and X, as proxies for Z<sup>-</sup> and Z<sup>+</sup> modules. Immunohistochemical analysis indicated that the  
191 TRPC3 expression differs substantially between these lobules (**Supplementary Fig. 1,**  
192 **Supplementary Movie**), suggesting that the effects of gain- and loss-of-function mutations  
193 could be directly related to protein levels. Alternatively, other differences in molecular  
194 machinery could underlie or further enhance this cellular differentiation, for instance through  
195 mGluR1b-related effects. As the difference in TRPC3 expression is minimal or absent in the  
196 more lateral parts of the cerebellum (**Supplementary Fig. 1, 2**), recording the activity of



197 adjacent Z<sup>-</sup> and Z<sup>+</sup> PCs there would solve this question. To this end, we crossed  
198 L7-TRPC3<sup>KO</sup> mice with EAAT4<sup>eGFP</sup> mice that express eGFP in Z<sup>+</sup> PCs to generate  
199 L7-TRPC3<sup>KO</sup>-EAAT4<sup>eGFP</sup> mice (**Supplementary Fig. 8**). Using two-photon microscopy, we  
200 identified Z<sup>+</sup> and Z<sup>-</sup> modules on the dorsal surface (lobules IV-VI and simplex) of the  
201 cerebellum and recorded PC activity (**Fig. 4a-b**). Here, the absence of TRPC3 attenuated the  
202 firing rate and enhanced the irregularity of Z<sup>-</sup> PCs even more robustly, without an effect on  
203 Z<sup>+</sup> PCs (**Fig. 4c-d, Supplementary Fig. 9a-c, cf Fig. 3f**). These results argue against a direct  
204 link between simple spike firing rate and TRPC3 levels and support the concept that other  
205 proteins, e.g. mGluR1b, influence TRPC3 activity and thereby control the spiking activity of  
206 PCs.

207 To test the possibility that developmental effects influenced PC activity in the adult mice  
208 we tested (L7<sup>Cre</sup> begins to be expressed in postnatal week 1-2), we crossed the *loxP*-flanked  
209 TRPC3 mice with tamoxifen-dependent L7<sup>Cre-ERT2</sup> to generate L7-TRPC3<sup>ckO</sup> mice (**Fig. 4e**). If  
210 the divergent effects of TRPC3 on Z<sup>-</sup> and Z<sup>+</sup> PCs are completely or in part of  
211 developmental origin, we should observe no or less changes in L7-TRPC3<sup>ckO</sup> adult mice  
212 after tamoxifen injections (injected after maturation). Four weeks after tamoxifen treatment,  
213 L7-TRPC3<sup>ckO</sup> mice showed a virtually complete ablation of TRPC3 in PCs (**Fig. 4f**). Again,  
214 simple spike regularity and firing rate were affected in Z<sup>-</sup>, but not Z<sup>+</sup> PCs of tamoxifen  
215 injected adult L7-TRPC<sup>ckO</sup> mice (**Fig. 4g-h, Supplementary Fig. 9g-i**), in a manner similar  
216 to that in L7-TRPC<sup>ckO</sup>.

217 Taken together and combined with L7-TRPC3<sup>KO</sup> data, these results indicate that the  
218 TRPC3-dependent effects in zebrin-identified PCs are independent of cerebellar  
219 development or developmental compensation. Moreover, the larger effect of TRPC3  
220 ablation on Z<sup>-</sup> PCs in areas where its expression is similar to that in Z<sup>+</sup> PCs suggests that  
221 other proteins contribute to the state of increased excitability in Z<sup>-</sup> PCs.

222

### 223 **TRPC3 mutations selectively affect the activity in Z<sup>-</sup> olivocerebellar modules**

224 PCs in the cerebellar cortex, form a closed loop with the cerebellar nuclei neurons they

225 innervate by their axon output and the olivary neurons from which they receive their climbing  
226 fiber input<sup>14</sup>. If TRPC3 contributes to the output of this loop, one could hypothesize that other  
227 elements in the loop should be affected by the mutations<sup>7,38</sup>. To test this hypothesis, we  
228 examined complex spikes activity in PCs, as the complex spike directly reflects the activity of  
229 the climbing fiber and thereby that of the inferior olivary neuron it originates from<sup>38</sup>. We  
230 identified complex spikes based on their characteristic shape in our *in vivo* recordings from  
231 Z- lobules I-III or Z+ lobule X (**Fig. 5a**). Complex spike firing rates were, similar to simple  
232 spike rates, higher in Z- than in Z+ PCs (**Fig. 5b**), as shown previously<sup>10</sup>. Chronic  
233 manipulations of TRPC3 activity, gain- and loss-of-function, in PCs predominantly affected  
234 complex spike firing rate in Z-, but not Z+ PCs (**Fig. 5b**). Intriguingly, acute ablation of  
235 TRPC3 in L7-TRPC3<sup>CKO</sup> mice did not affect complex spike activity in terms of firing rate, CV,  
236 CV2 or pause in simple spikes following climbing fiber activation (CF-pause) in Z- PCs (**Fig.**  
237 **5b, Supplementary Fig. 9j-l**). In line with the lower simple spike firing rates in  
238 loss-of-function TRPC3 mutants, the CF-pause of L7-TRPC3<sup>KO</sup> and L7-TRPC3<sup>KO</sup>-EAAT4<sup>eGFP</sup>  
239 mice were longer, selectively in Z- PCs (**Supplementary Fig. 7l, S9f**). Except for the CV  
240 value, other complex spike parameter changes in TRPC3<sup>Mwk</sup> mice were not affected  
241 (**Supplementary Fig. 7d-f**). Together, *in vivo* experiments indicate that TRPC3 also  
242 selectively affects the activity in the inferior olive in that the Z- modules are most  
243 prominently affected, and this influence has a developmental component.

244 Complex spikes are known to have a direct influence on simple spike activity (CS-SS)<sup>10,39</sup>.  
245 Based on the peri-complex spike time histograms, we could categorize four different types of  
246 simple spike responses following the CF-pause (see also ref.<sup>10</sup>), including no change in rate  
247 (normal), increased simple spike activity (facilitation), decreased simple spike activity  
248 (suppression), and a superimposed oscillatory pattern (oscillation) (**Fig. 5c**). Our data  
249 confirmed our previous finding<sup>10</sup> that the CS-SS interaction pattern among the Z+ and Z- PCs  
250 is different in that the facilitation prevails in the Z- PCs, whereas the suppression and  
251 oscillation types occur predominantly in the Z+ PCs (**Fig. 5d**). In addition, we found that  
252 manipulation of TRPC3 activity changed the types of CS-SS responses most frequently in Z-

253 PCs (**Fig. 5d**). Interestingly, Z- PCs exhibited much more suppression in gain-of-function  
254 TRPC3<sup>Mwk</sup> mutants and vice versa more facilitation in loss-of-function  
255 L7-TRPC3<sup>KO</sup>-EAAT4<sup>eGFP</sup> mice, compared to those in their littermate controls (**Fig. 5d**),  
256 suggesting that Z- PCs partly compensate for the effects of TRPC3 manipulation.

257 Together, these results indicate that TRPC3 controls not only the activity of PCs, but also  
258 that of the inferior olivary neurons, another element in the olivocerebellar loop. Moreover,  
259 manipulation of TRPC3 activity alters the interaction between complex spikes and simple  
260 spikes.

261

### 262 **Functional heterogeneity of TRPC3 is reflected in differential effects on motor behaviors**

263 The ultimate question is: does cellular heterogeneity of PCs also differentially affect their  
264 contribution to specific cerebellar functions? As the TRPC3<sup>Mwk</sup> mutation is not cell-specific  
265 and affects for instance also UBCs, we focused on the behavioral effects in L7-TPRC3<sup>KO</sup>  
266 mice. Before testing specific functions, we first evaluated the consequences of the  
267 manipulations of TRPC3 on locomotion, a type of behavior that by nature requires the entire  
268 body and as such can be linked to many sub-regions of the cerebellar cortex, from the Z+  
269 vestibular zones to the Z- anterior lobules. We first investigated whether these mutant mice  
270 showed any obvious deficits in locomotion using the Erasmus Ladder<sup>9</sup>. L7-TPRC3<sup>KO</sup> mice  
271 could not be discriminated from control littermates by the percentage of different types of  
272 steps, including lower steps, also known as missteps (**Supplementary Fig. 10**). The apparent  
273 discrepancy with earlier evidence in stride width in the global TRPC3 knockout<sup>28</sup> could be  
274 due to the different methods or the fact that UBCs, particularly important in the vestibular  
275 zone, are also affected in that mouse model<sup>40</sup>.

276 Next, we subjected L7-TPRC3<sup>KO</sup> mice to two specific, but intrinsically distinct types of  
277 cerebellum-dependent learning tasks, i.e., vestibulo-ocular reflex (VOR) adaptation and  
278 eyeblink conditioning. VOR adaptation is the adjustment of the amplitude and/or direction of  
279 compensatory eye movements controlled by the vestibulocerebellum (**Fig. 6a-c**), which is  
280 predominantly Z+ (**Supplementary Fig. 11a**). Eyeblink conditioning requires the animal to

281 generate a well-timed movement following a previously unrelated sensory input and is linked  
282 to more anterior regions that are largely Z- (**Fig. 7a, Supplementary Fig. 11b**). Note that the  
283 difference in zebrin labeling is pronounced between the two related regions, while the  
284 difference in TRPC3 staining is less clear (**Supplementary Fig. 11**). Nonetheless, given the  
285 electrophysiological changes described above, we hypothesized that altered TRPC3 function  
286 should impair Z- linked eyeblink conditioning, whereas VOR adaptation would be  
287 unaffected.

288 Before examining adaptation, we first tested if the basal eye movement reflexes, the  
289 optokinetic reflex driven by visual input (OKR) and the vestibular input-driven VOR (in the  
290 dark) and visually-enhanced VOR (VVOR, in the light), were affected. Neither the gain (the  
291 ratio of eye movement to stimulus amplitude), nor the phase (timing of the response relative  
292 to input), differed significantly between L7-TPRC3<sup>KO</sup> mutants and littermate controls  
293 (**Supplementary Fig. 12a**). Next, using mismatched visual and vestibular stimulation, we  
294 tested the ability of mutant mice to adapt their compensatory eye movements. When  
295 L7-TPRC3<sup>KO</sup> mice were subjected to both out-of-phase and in-phase training paradigms, we  
296 did not observe any significant deficit in the VOR gain increase and VOR gain decrease,  
297 respectively (**Fig. 6d-e**). To evaluate the ability of the mice to perform a long-term, more  
298 demanding adaptation, we subjected the mice for three more days, following the gain  
299 decrease training, to a training stimulus aimed at reversing the direction of their VOR,  
300 referred to as VOR phase reversal (**Fig. 6g**). Again, no difference was found between  
301 L7-TPRC3<sup>KO</sup> and control littermate mice: neither in the VOR phase over the training (**Fig.**  
302 **6h**), nor in the increased OKR gain following the phase reversal training (**Fig. 6f**, compare to  
303 **Supplementary Fig. 12a**).

304 To determine whether the differential activity of TRPC3 ultimately also affects the  
305 behavior of the animal, we subjected mice to a task linked to Z- modules, i.e. delay eyeblink  
306 conditioning. Mice were trained using a light pulse with 250 ms duration as the conditioned  
307 stimulus (CS) and a puff to the cornea as a short unconditioned stimulus (US) at the end of the  
308 CS, which over the period of several days evoked conditioned responses (CR, preventative

309 eyelid closure) in the absence of the US (**Fig. 7b**). In contrast to VOR adaptation, the  
310 L7-TPRC3<sup>KO</sup> mice showed significant deficits in eyeblink conditioning during the first week  
311 of training (**Fig. 7c**). However, when we subjected them to longer periods they reached  
312 similar CR percentages, amplitudes and timing (**Fig. 7d, Supplementary Fig. 12b**).

313 Thus, although TRPC3 is expressed in both regions underlying the cerebellum-dependent  
314 behavioral experiments tested here, TRPC3 activity is selectively required to optimize the  
315 cerebellum-dependent learning behavior that is processed in a Z- module<sup>17</sup>. This indicates  
316 that the cellular heterogeneity and consequential differentiation in cellular activity also affects  
317 the behavior of the animals.

318

## 319 Discussion

320 The cerebellum offers a rich repertoire of electrophysiological properties that allows us to  
321 coordinate a wide variety of sensorimotor and cognitive behaviors. We recently uncovered  
322 that there are probably two main heterogeneous types of cerebellar modules with different  
323 intrinsic profiles and plasticity rules<sup>10</sup>. This organization is highly preserved throughout  
324 phylogeny and characterized by a series of molecular markers such as zebrin that are  
325 distributed in a complementary fashion across the cerebellar cortex<sup>16,41,42</sup>. Here, we  
326 demonstrated that zebrin-negative PCs show a relatively high expression of TRPC3, which  
327 has a dominant impact on its electrophysiological features. Indeed, gain-of-function and  
328 loss-of-function mutations in the gene encoding for TRPC3 selectively affected activity in the  
329 zebrin-negative modules and the motor behavior that is controlled by these modules.

330 TRPC channels, which are calcium-permeable upon activation by phospholipase C or  
331 diacylglycerol, are widely expressed in the brain and critically involved in the development  
332 and maintenance of synaptic transmission<sup>28,43-45</sup>. TRPC1 and TRPC3 are both prominently  
333 expressed in the cerebellum, but in PCs TRPC3 is most abundant<sup>28</sup>. In addition to its  
334 contribution to intrinsic activity, TRPC3 currents also mediate the slow excitatory  
335 postsynaptic potential following activation of mGluR1b, which is expressed in a pattern  
336 complementary to that of zebrin<sup>26,27,45</sup>. The finding that TRPC3 can be detected in all PCs, but  
337 that effects of ablation are restricted to zebrin-negative PCs suggests that it is in fact the  
338 ‘molecular machinery’ involving mGluR1b activation that drives the differential effects of  
339 TRPC3 activation.

340 In contrast to mGluR1b, mGluR1a is expressed by all PCs (estimated ratio 2:1 to  
341 mGluR1b)<sup>27</sup>. The metabotropic receptor mGluR1a is important for IP3-mediated calcium  
342 release, climbing fiber elimination as well as PF-PC LTD<sup>26</sup>. Intriguingly, and in line with the  
343 concept of modular differentiation, mGluR1-dependent processes are hampered in  
344 zebrin-positive PCs by the expression of EAAT4<sup>21</sup>, whereas zebrin-negative PCs selectively  
345 express PLCβ4 that works in concert with mGluR1a<sup>26</sup>. The differences in expression patterns

346 may enhance the probability of PF-PC LTD in zebrin-negative PCs over that in  
347 zebrin-positive PCs, which is supported by experiments performed in P21 mice<sup>21</sup>. The  
348 consequences of EAAT4 or PLC $\beta$ 4 deletion on PC physiology have been evaluated *in vitro* in  
349 several studies<sup>21-24</sup>, but what the consequences *in vivo* on circuit physiology and on the  
350 behaviors tested here are, is unclear. Our results here demonstrate that changes that occur at  
351 the cell physiological level, i.e. reduced simple spike rate and altered CS-SS interaction, lead  
352 to a more complex pattern of changes in the intact system. The additional effects are  
353 particularly striking in the L7-TPRC3<sup>KO</sup> mice, where the reduced simple spike rate in  
354 zebrin-negative PCs leads to a lower complex spike rate. In principle, this could have been a  
355 direct effect, as lower simple spike rate results in reduced inhibition of the also inhibitory  
356 projection from the cerebellar nuclei to the inferior olive<sup>7,46</sup>. However, the unaltered complex  
357 spike rate of L7-TRPC3<sup>CKO</sup> mice suggests that the changes occur during development.

358 To test the functional consequences of the loss of TRPC3 and the modular specificity of  
359 these effects, we tested the impact on behavioral experiments that can be linked to specific  
360 modules. Eyeblink conditioning and VOR adaptation are controlled by different modules in  
361 the cerebellum and they are distinctly different by nature. Eyeblink conditioning requires a  
362 novel, well-timed eyelid movement to a previously unrelated, neutral stimulus, and has been  
363 linked to largely or completely zebrin-negative modules in the anterior cerebellum<sup>30,31</sup>. The  
364 activity of the putative zebrin-negative PCs in this area is relatively high at rest<sup>47</sup>, in line with  
365 their zebrin identity, and a decrease in this high firing rate correlates to the eyeblink  
366 response<sup>47-49</sup>. Conversely, VOR adaptation adjusts the amplitude of an existing reflex to  
367 optimize sensory processing using visual feedback and is controlled by the  
368 vestibulocerebellum, the flocculus in particular, which is classically considered to be  
369 zebrin-positive<sup>10,29</sup> (cf ref.<sup>15,50</sup>). There are more variations in VOR adaptation and the  
370 underlying activity patterns are less well-described. In unidirectional VOR gain increase, we  
371 recently found that the change correlating with the adapted eye movement consisted of a  
372 potentiation, an increase, of the -at rest- lower PC firing rate<sup>51</sup>. Although our current study has  
373 its main focus on the differential contribution of TRPC3 at the cell and systems physiological

374 level, it is tempting to speculate how the loss of TRPC3 in PCs results in an eyeblink  
375 conditioning phenotype without affecting VOR adaptation. The reduction in firing rate of  
376 zebrin-negative PCs may directly contribute to the impaired conditioning. The suppression of  
377 simple spike firing that correlates with the conditioned response could be occluded by the  
378 lower resting rate in L7-TPRC3<sup>KO</sup> mice. Alternatively, PF-PC LTD could play a role as it is in  
379 line with the simple spike suppression and blocking TRPC3 function completely abolishes  
380 this form of LTD<sup>52</sup>. However, genetically ablating PF-PC LTD did not affect the ability to  
381 perform eyeblink conditioning successfully<sup>53</sup>, arguing against an exclusive role for this form  
382 of plasticity. Schreurs and colleagues demonstrated that intrinsic excitability is increased after  
383 eyeblink conditioning<sup>54</sup>. A third option could be that TRPC3 also affects the adaptive increase  
384 of excitability, intrinsic plasticity, which is calcium-activated potassium channel function  
385 dependent<sup>55</sup>, and thereby delays the expression of a conditioned blink response. All three  
386 options would not necessarily affect VOR adaptation and could contribute to the deficits in  
387 eyeblink conditioning, but given the relatively mild phenotype, one or two could be sufficient.  
388 Future experiments will have to unravel the cellular changes underlying eyeblink conditioning  
389 and VOR adaptation and the specific role of TRPC3 in the former.

390 In this study we aimed to gain insight in the mechanisms that convert molecular  
391 heterogeneity into differentiation of cell physiology and function. This mechanistic question  
392 goes hand in hand with the more conceptual question: why are there, at least, two different  
393 types of PCs? An appealing hypothesis is that zebrin-negative and zebrin-positive bands  
394 control two muscles with opposing functions, e.g. a flexor and an extensor. However,  
395 trans-synaptic retrograde tracing using rabies virus from antagonist muscles demonstrated that  
396 although 3<sup>rd</sup> order labeling can be found in different parasagittal strips of PCs, there is no  
397 apparent division in zebrin-negative and zebrin-positive strips<sup>56</sup>. A second possibility would  
398 be that individual muscles are controlled by either only zebrin-negative or zebrin-positive  
399 strips, or a combination of both, when needed. In the vestibulocerebellum of the pigeon, each  
400 movement direction is controlled by a set of zebrin-negative and zebrin-positive bands<sup>16</sup>. In  
401 this configuration each PC within the set, or separately, would then serve a distinct function,



402 for which it is optimized by gene expression patterns. This dissociation of function could  
403 entail e.g. timing versus coordination<sup>57</sup> or moving versus holding still<sup>58</sup>, although none of  
404 these distinctions have been linked to specific zebrin-identified modules. Alternatively, it may  
405 the net polarity of the connectivity downstream of the cerebellar nuclei up to the motor  
406 neurons or the cerebral cortical neurons that determines the demand(s) of the module(s)  
407 involved<sup>17</sup>. Module-specific driver lines would greatly aid to answer these questions, but are  
408 currently not available.

409 To summarize, our results support the hypothesis that cerebellar modules control distinct  
410 behaviors based on cellular heterogeneity, with differential molecular configurations. We  
411 present the first evidence for a non-uniform expression pattern of TRPC3 in PCs,  
412 complementary to that of zebrin in the vermis but more homogeneous in the hemispheres.  
413 Nonetheless, TRPC3 effects are directly coupled to zebrin, a specificity that putatively  
414 requires mGluR1b<sup>26</sup>, the activator of TRPC3 that is expressed in a pattern perfectly  
415 complementary to zebrin<sup>27</sup>.

416 Since the discovery of protein expression patterns in the cerebellar cortex<sup>12</sup>, numerous  
417 other proteins with patterned expression have been identified<sup>20</sup>. These patterns have been  
418 linked to circuit organizations of modules<sup>41</sup>, to disease and degeneration<sup>20</sup>, and more recently  
419 to electrophysiological differences<sup>10,21</sup>. Altogether, this work demonstrates that proper  
420 cerebellar function is based on the presence of (at least) two *modi operandi* that have distinct  
421 molecular machineries, with a central role for TRPC3, to differentially control sensorimotor  
422 integration in downstream circuitries that require control with opposite polarity.

423

## 424 **Materials and Methods**

### 425 **Animals**

426 For all experiments, we used adult male and female mice with a C57Bl/6 background that  
427 were, unless stated otherwise, individually housed, had food ab libitum and were on a 12:12  
428 light/dark cycle. In all experiments the experimenters were blind to mouse genotypes. All  
429 experiments were approved by the Dutch Ethical Committee for animal experiments and were  
430 in accordance with the Institutional Animal Care and Use Committee.

431 The generation of TRPC3<sup>Mwk</sup> mice has been described previously<sup>32</sup>. Briefly, male  
432 BALB/cAnN mice carrying the *Mwk* mutation which was generated in a large-scale ENU  
433 mutagenesis program were subjected to cross with normal C3H/HeH females, and the first  
434 filial generation (F<sub>1</sub>) progeny were screened for a variety of defects. The *Mwk* colony was  
435 maintained by repeated backcrossing to C3H/HeH. Experimental mice were generated by  
436 crossing C3H/HeH mice heterozygous for the *Mwk* mutation with C57Bl/6 mice. Offspring  
437 with the *Mwk* mutation on one allele were classified as gain-of-function TRPC3 Moonwalker  
438 mutant (referred to as TRPC3<sup>Mwk</sup>) and littermate mice lacking the *Mwk* mutation were used as  
439 controls. Note that, the TRPC3<sup>Mwk</sup> mutants present evident ataxic phenotype from a very early  
440 age, concomitant with progressive degeneration of UBCs and PCs<sup>40</sup>.

441 Mice in which exon 7 of the TRPC3 gene was flanked by *loxP* sites (TRPC3<sup>fl/fl</sup> mice)<sup>3</sup> were  
442 bred with mice that express the Cre gene under L7 promoter (PCP2<sup>Cre/-</sup> mice)<sup>33</sup>. The resulting  
443 offspring was genotyped using PCR of genomic DNA extracted from tail or toe by standard  
444 procedures. The F<sub>1</sub> was crossed again with the TRPC3<sup>fl/fl</sup> mice. Among the second filial  
445 generation (F<sub>2</sub>), mice homozygous for the *loxP* sites and one Cre allele were classified as

446 PC-specific TRPC3 knockout ( $L7^{Cre/-};TRPC3^{fl/fl}$ , here referred to as  $L7-TRPC3^{KO}$ ) mice and  
447 as controls when Cre was absent from the genome ( $L7^{-/-};TRPC3^{fl/fl}$ , here “littermate  
448 controls”).

449  $L7-TRPC3^{KO}-EAAT4^{eGFP}$  mice were generated by crossing  $L7^{Cre/-};TRPC3^{fl/fl}$  mice with  
450 heterozygous  $EAAT4^{eGFP/-}$  mice which express enhanced green fluorescent protein (eGFP)  
451 under control of EAAT4 promoter (**Supplementary Fig. 8**). The  $F_2$  offspring those who  
452 expressed  $TRPC3^{fl/-}$ ,  $L7^{Cre/-}$  and  $EAAT4^{eGFP/-}$  were crossed again with the  $TRPC3^{fl/fl}$  mice.  
453 Among the  $F_3$ , mice with a homozygous expression of floxed-TRPC3, one Cre allele and one  
454  $EAAT4^{eGFP}$  allele ( $L7^{Cre/-};TRPC3^{fl/fl};EAAT4^{eGFP/-}$ ), were used and referred to as  $L7-TRPC3$   
455  $KO-EAAT4^{eGFP}$  mutant mice and as controls when Cre was absent from the genome  
456 ( $L7^{-/-};TRPC3^{fl/fl};EAAT4^{eGFP/-}$ ).

457 Inducible PC-specific TRPC3 knockouts ( $TRPC3^{eKO}$ ) were generated by crossbreeding  
458 mice carrying the floxed TRPC3 with mice expressing the tamoxifen-sensitive Cre  
459 recombinase Cre-ERT2 under the control of the L7 promoter (obtained from the Institut  
460 Clinique de la Souris, [www.ics-mci.fr](http://www.ics-mci.fr)) (experimental mice:  $L7^{Cre-ERT2/-};TRPC3^{fl/fl}$ ). Tamoxifen  
461 was dissolved in corn oil to obtain a 20 mg/ml solution, and intraperitoneally injected into all  
462 subjects for consecutive 5 days, four weeks prior to electrophysiological recordings.  
463 Injections were performed in adults between 12-31 weeks of age. Experimental cohorts were  
464 always injected at the same time. Mice without  $L7^{Cre-ERT2}$  expression were as control in this  
465 study (experimental mice:  $L7^{-/-};TRPC3^{fl/fl}$ ).

466

467 **Immunohistochemistry**

468 Anesthetized mice were perfused with 4% paraformaldehyde in 0.12M phosphate buffer (PB).  
469 Brains were taken out and post-fixed for 1 h in 4% PFA at room temperature, then transferred  
470 in 10% sucrose overnight at 4°C. The next day, the solution was changed for 30% sucrose and  
471 left overnight at 4°C. Non-embedded brains were sectioned either sagittally or transversally at  
472 40µm thickness with freezing microtome. Free-floating sections were rinsed with 0.1M PB  
473 and incubated 2h in 10mM sodium citrate at 80°C for 2 h, for antigen retrieval. For  
474 immuno-fluorescence, sections were rinsed with 0.1M PB, followed by 30 minutes in  
475 Phosphate Buffered saline (PBS). Sections were incubated 90 minutes at room temperature in  
476 a solution of PBS/0.5%Triton-X100/10% normal horse serum to block nonspecific  
477 protein-binding sites, and incubated 48 h at 4°C in a solution of PBS/0.4% Triton-X100/2%  
478 normal horse serum, with primary antibodies as follows: Aldolase C (1:500, goat polyclona,  
479 SC-12065), Calbindin (1:7000, mouse monoclonal, Sigma, #C9848), and TRPC3 (1:500,  
480 rabbit polyclonal, Cell Signaling, #77934). After rinsing in PBS, sections were incubated 2 h  
481 at room temperature in PBS/0.4% Triton-X100/2% normal horse serum solution with  
482 secondary antibodies coupled with Alexa488, Cy3 or Cy5 (Jackson ImmunoResearch), at a  
483 concentration of 1:200. Sections were mounted on coverslip in chrome alum  
484 (gelatin/chromate) and covered with Mowiol (Polysciences Inc.). For Light Microscopy  
485 section were pre-treated for endogenous peroxidase activity blocking with 3%H<sub>2</sub>O<sub>2</sub> in PBS,  
486 then rinsed for 30 minutes in PBS, incubated 90 minutes in a solution of  
487 PBS/0.5%Triton-X100/10% normal horse serum to block nonspecific protein-binding sites,  
488 followed by the primary antibody incubation as described before. After 48 h, sections were  
489 rinsed in PBS and incubated 2h at room temperature in PBS/0.4% Triton-X100/10% normal

490 horse serum solution with HRP coupled secondary antibodies (Jackson ImmunoResearch), at  
491 a concentration of 1:200. Sections were rinsed with 0.1M PB and incubated in  
492 diaminobenzidine (DAB, 75 mg/100ml) for 10 minutes. Sections were mounted on glasses in  
493 chrome alum (gelatin/chromate), dried with successive Ethanol steps, incubated in Xylene  
494 and covered with Permount mounting medium (Fisher Chemical). Images were acquired with  
495 an upright LSM 700 confocal microscope (Zeiss) for fluorescent microscopy, and  
496 Nanozoomer (Hamamatsu) for light microscopy.

497

#### 498 **iDISCO and light sheet imaging**

499 This protocol has been adapted from a previous study<sup>59</sup>. After normal perfusion and  
500 post-fixation, brains were washed successively in PBS (1.5 h), 20% methanol/H<sub>2</sub>O (1 h), 50%  
501 methanol/H<sub>2</sub>O (1 h), 80% methanol/H<sub>2</sub>O (1 h), and 100% methanol (1 h) twice. To increase  
502 clearance, samples were treated with a solution of dichloromethane (DCM) and 100%  
503 methanol (2:1) for another hour. Brains were then bleached with 5% H<sub>2</sub>O<sub>2</sub> in 90% methanol  
504 (ice cold) at 4°C overnight. After bleaching, samples successively washed in 80%  
505 methanol/H<sub>2</sub>O, 50% methanol/H<sub>2</sub>O, 40% methanol/PBS, and 20% methanol/PBS, for 1 h  
506 each, and finally in PBS/0.2% Triton X-100 for 1 h twice. After rehydration, samples were  
507 pre-treated in a solution of PBS/0.2% Triton X-100/20% DMSO/0.3 M glycine at 37°C for 36  
508 h, then blocked in a mixture of PBS/0.2% Triton X-100/10% DMSO/6% donkey serum at  
509 37°C for 48 h. Brains were incubated in primary antibody in PTwH solution (PBS/0.2%  
510 Tween-20/5% DMSO/3% donkey serum with 10 mg/ml heparin) for 7 days at 37°C with  
511 primary antibody: TRPC3 rabbit polyclonal, 1:500 (Cell Signaling, #77934). Amphotericin

512 was added once every two days at 1 $\mu$ g/ml to avoid bacterial growth. Samples were then  
513 washed in 24 h in PTwH for six times (1h for each, after the fourth wash, leave it at room  
514 temperature overnight), followed by the second round of 7-day incubation with primary  
515 antibody. Brains were then washed in PTwH , 6 washes in 24 h, as described before, then  
516 incubated in secondary antibody in PTwH/ 3% donkey serum at 37°C for 7 days with  
517 secondary anti-Rabbit Cy3 (Jackson ImmunoResearch) at 1:750. Brains were then washed in  
518 PTwH, 6 washes in 24 h, again, followed by successive washes in 20% methanol/H<sub>2</sub>O, 40%  
519 methanol/H<sub>2</sub>O, 60% methanol/H<sub>2</sub>O, 80% methanol/H<sub>2</sub>O, and 100% methanol twice, for 1 h  
520 each, and finally incubation overnight in a solution of DCM and 100% methanol. For tissue  
521 clearing, brains were incubated 20 mins in DCM, twice, and conserved in Benzyl ether at  
522 room temperature.

523 Ready samples were imaged in horizontal orientation with an UltraMicroscope II (LaVision  
524 BioTec) light sheet microscope equipped with Inspector (version 5.0285.0) software  
525 (LaVision BioTec). Images were taken with a Neo sCMOS camera (Andor) (2560x2160  
526 pixels. Pixel size: 6.5 x 6.5  $\mu$ m<sup>2</sup>). Samples were scanned with double-sided illumination, a  
527 sheet NA of 0.148348 (results in a 5  $\mu$ m thick sheet) and a step-size of 2.5  $\mu$ m using the  
528 horizontal focusing light sheet scanning method with the optimal amount of steps and using  
529 the contrast blending algorithm. The effective magnification for all images was 1.36x  
530 (zoombody\*objective + dipping lens = 0.63x\*2.152x). Following laser filter combinations  
531 were used: Coherent OBIS 488-50 LX Laser with 525/50nm filter, Coherent OBIS 561-100  
532 LS Laser with 615/40 filter, Coherent OBIS 647-120 LX with 676/29 filter.

533

534 **Western blot and fractionation**

535 Cerebellar tissue from L7-TRPC3<sup>KO</sup> and control mice was dissected and immediately frozen  
536 in liquid nitrogen. Samples were homogenized with a Dounce homogenizer in lysis buffer  
537 containing 50 mM Tris-HCl pH 8, 150 mM NaCl, 1% Triton X-100, 0.5% sodium  
538 deoxycholate, 0.1% SDS and protease inhibitor cocktail. Protein concentrations were  
539 measured using Pierce BCA protein assay kit (Thermo Fisher). Samples were denatured and  
540 proteins were separated by SDS-PAGE in Criterion™ TGX Stain-Free™ Gels (Bio-Rad), and  
541 transferred onto nitrocellulose membranes with the Trans-Blot® Turbo™ Blotting System  
542 (Bio-Rad). Membranes were blocked with 5% BSA (Sigma-Aldrich) in TBST (20mM  
543 Tris-HCl pH7.5, 150mM NaCl and 0.1%, Tween20) for 1 h and probed with the following  
544 primary antibodies: rabbit anti-TRPC3 (Cell Signaling Technology, #77934; 1:1000) and  
545 mouse anti-actin (Millipore, MAB1501; 1:1000). Secondary antibodies used were IRDye  
546 800CW Donkey anti-Rabbit IgG (LI-COR Biosciences, Cat # 925-32213; 1:20000) and  
547 IRDye 680RD Donkey anti-Mouse IgG (LI-COR Biosciences, Cat # 925-68072; 1:20000).  
548 Membranes were scanned by Odyssey Imager (LI-COR Biosciences) and quantified using  
549 Image Studio Lite (LI-COR Biosciences). For quantification, densitometry of protein bands of  
550 interest was normalized to that of actin.

551 For fractionation experiments, cerebellar tissues from C57/BL6 were collected and the  
552 synaptosomes were isolated using Syn-PER™ Synaptic Protein Extraction Reagent  
553 (ThermoScientific, #87793) according to the manufacturer's instructions.

554

555 ***In vivo* extracellular recordings and analysis**

556 We performed in vivo extracellular recordings in adult TRPC3<sup>Mwk</sup> (aged 15-47 weeks),  
557 L7-TRPC3<sup>KO</sup> (aged 22-43 weeks), L7-TRPC3<sup>eKO</sup> (aged 17-28 weeks) mice, respectively, as  
558 previously described<sup>5</sup>. Briefly, an immobilizing pedestal consisting of a brass holder with a  
559 neodymium magnet (4x4x2 mm) was fixed on the skull, overlying the frontal and parietal  
560 bones, and then a craniotomy (Ø 3 mm) was made in the interparietal or occipital bone under  
561 general anesthesia with isoflurane/O<sub>2</sub> (4% induction, 1.5-2% maintenance). After over 24 h of  
562 recovery, mice were head-fixed and body restrained for recordings. PCs were recorded from  
563 vermal lobules I-III and X, using a glass pipette (OD 1.5 mm, ID 0.86 mm, borosilicate,  
564 Sutter Instruments, USA; 1-2 µm tips, 4-8 MΩ) with a downward pitch angle of 40° and 65°  
565 respectively. The pipettes were filled with 2 M NaCl-solution and mounted on a digital 3-axis  
566 drive (SM-5, Luigs Neumann, Germany). After recording, biotinylated dextran amines (BDA)  
567 was iontophoretically injected to confirm that the recordings were from Lobules I-III or X.  
568 PCs were identified by the presence of simple and complex spikes, and determined to be from  
569 a single unit by confirming that each complex spike was followed by a climbing fiber pause.  
570 All in vivo recordings were analyzed offline using Spiketrain (Neurasmus BV, Rotterdam,  
571 The Netherlands), running under MatLab (Mathworks, MA, USA). For each cell, the firing  
572 rate, CV and mean CV2 were determined for simple and complex spikes, as well as the  
573 climbing fiber pause. The CV is calculated by dividing the standard deviation, SD, by the  
574 mean of ISIs, whereas CV2 is calculated as  $2 \times |ISI_{n+1} - ISI_n| / (ISI_{n+1} + ISI_n)$ . Both are measures  
575 for the regularity of the firing, with CV reflecting that of the entire recording and mean CV2  
576 that of adjacent intervals, making the latter a measure of regularity on small timescales. The  
577 climbing fiber pause is determined as the duration between a complex spike and the first



578 following simple spike. To extend this analysis, we also plotted histograms of simple spike  
579 activity time locked on the complex spike, and labelled the shape of this time histogram as  
580 normal, facilitation, suppression, or oscillation<sup>5</sup>.

581

### 582 ***In vivo* two-photon targeted electrophysiology**

583 Details on targeted electrophysiological recordings *in vivo* in the mouse cerebellum were  
584 described previously<sup>36</sup>. PCs in lobules IV-VI were recorded in adult L7-TRPC3<sup>KO</sup>-EAAT4<sup>eGFP</sup>  
585 mice (aged 14-49 weeks) under two-photon microscope guidance. A custom-made head plate  
586 was fixed to the cleaned skull of each animal, under isoflurane anesthesia, with dental  
587 adhesive (Optibond; Kerr corporation, West collins, USA) and secured with dental acrylic. A  
588 craniotomy was made above the cerebellum, exposing lobules IV-VI. The craniotomy was  
589 sealed with biocompatible silicone (Kwik-Cast; World Precision Instruments) and the animal  
590 was allowed to recover from surgery before recording. The silicone seal was removed prior to  
591 recording. To keep the brain surface moist, Ringer solution containing (in mM): NaCl 135,  
592 KCl 5.4, MgCl<sub>2</sub> 1, CaCl<sub>2</sub> 1.8, HEPES 5 (pH 7.2 with NaOH; Merck, Darmstadt, Germany)  
593 was applied. Glass micropipettes with tip size of ~1 μm (resistance: 6-9 MΩ) were advanced  
594 from the dorsal surface under a 25° angle into the cerebellum, allowing concurrent  
595 two-photon imaging with a long working distance objective (LUMPlanFI/IR 40×/0.8;  
596 Olympus) on a custom-built two-photon microscope. Pipettes were filled with the same  
597 Ringer solution with an additional 40 μM AlexaFluor 594 hydrazide (Sigma-Aldrich,  
598 Steinheim, Germany) for visualization. GFP and AlexaFluor 594 were simultaneously excited  
599 by a MaiTai laser (Spectra Physics Lasers, Mountain View, CA, USA) operated at 860 nm.

600 Green (GFP) and red (AlexaFluor 594) fluorescence were separated by a dichroic mirror at  
601 560nm and emission filters centered at 510nm (Brightline Fluorescence Filter 510/84;  
602 Semrock) and 630nm (D630/60; Chroma), respectively. The brain surface was stabilized with  
603 agarose (2% in Ringer; Sigma–Aldrich) and pipette pressure was initially kept at 3 kPa while  
604 entering the brain tissue. It was then removed for cell approach and the actual recording.  
605 Extracellular potentials were acquired with a MultiClamp 700A amplifier (Molecular Devices,  
606 Sunnyvale, CA, USA) in current-clamp mode. Signals were low-pass filtered at 10 kHz  
607 (four-pole Bessel filter) and digitized at 25 kHz (Digidata 1322A). Data were recorded with  
608 pCLAMP 9.2 (Molecular Devices). Z+ and Z– cells were identified by comparing the relative  
609 intensity of GFP fluorescence. Whenever possible, cells of both types were recording  
610 alternatingly between adjacent bands Purkinje neurons with high and low GFP fluorescence.

611

### 612 ***In vitro* electrophysiology and analysis**

613 We performed *in vitro* electrophysiological recordings on TRPC3<sup>Mwk</sup> (aged 9-21 weeks) and  
614 L7-TRPC3<sup>KO</sup> (aged 20-60 weeks). As described previously<sup>60</sup>, acute sagittal slices (250 μm  
615 thick) were prepared from the cerebellar vermis and put into ice-cold slicing medium which  
616 contained (in mM) 240 sucrose, 2.5 KCl, 1.25 Na<sub>2</sub>HPO<sub>4</sub>, 2 MgSO<sub>4</sub>, 1 CaCl<sub>2</sub>, 26 NaHCO<sub>3</sub> and  
617 10 D-Glucose, carbogenated continuously with 95% O<sub>2</sub> and 5% CO<sub>2</sub>. After cutting using a  
618 vibrotome (VT1200S, Leica), slices were incubated in artificial cerebrospinal fluid (ACSF)  
619 containing (in mM): 124 NaCl, 5 KCl, 1.25 Na<sub>2</sub>HPO<sub>4</sub>, 2 MgSO<sub>4</sub>, 2 CaCl<sub>2</sub>, 26 NaHCO<sub>3</sub> and 15  
620 D-Glucose, equilibrated with 95% O<sub>2</sub> and 5% CO<sub>2</sub> at 33.0±1.0 °C for 30 min, and then at  
621 room temperature. NBQX (10 μM), DL-AP5 (50 μM), and picrotoxin (100 μM) were

622 bath-applied to block AMPA-, NMDA-, and GABA subtype A (GABA<sub>A</sub>)-receptors,  
623 respectively. PCs were identified using visual guidance by DIC video microscopy and  
624 water-immersion 40X objective (Axioskop 2 FS plus; Carl Zeiss, Jena, Germany). Recording  
625 electrodes (3-5 MΩ, 1.65 mm outside diameter and 1.11 mm interior diameter (World  
626 Precision Instruments, Sarasota, FL, USA) were prepared using a P-97 micropipette puller  
627 (Sutter Instruments, Novato, CA, USA), and filled with ACSF for cell-attached recordings, or  
628 with an intracellular solution containing (in mM): 120 K-Gluconate, 9 KCl, 10 KOH, 4 NaCl,  
629 10 HEPES, 28.5 Sucrose, 4 Na<sub>2</sub>ATP, 0.4 Na<sub>3</sub>GTP (pH 7.25-7.35 with an osmolality of 295)  
630 for whole-cell recordings. We measured spontaneous firing activity of PCs in cell-attached  
631 mode (0 pA injection) and intrinsic excitability in whole-cell current-clamp mode by injection  
632 of brief (1s) depolarizing current pulses (ranging from -100 to 1100pA with 100pA  
633 increments) from a membrane holding potential of -65 mV at 33.0±1.0°C. The spike count of  
634 evoked action potential was taken as a measure of excitability. AP properties including peak  
635 amplitude, after-hyperpolarization amplitude (AHP) and half-width were evaluated using the  
636 first action potential generated by each PC. AHP indicates the amplitude of undershoot  
637 relative to the resting membrane potential. Half-width indicates the width of the signal at 50%  
638 of the maximum amplitude. PCs that required > -800 pA to maintain the holding potential at  
639 -65 mV or fired action potentials at this holding potential were discarded. The average spiking  
640 rate measured over the entire current pulse was used to construct current-frequency plots. For  
641 whole-cell Recordings, cells were excluded if the series (R<sub>s</sub>) or input resistances (R<sub>i</sub>) changed  
642 by >15% during the experiment, which was determined using a hyperpolarizing voltage step  
643 relative to the -65 mV holding potential. All electrophysiological recordings were acquired in

644 lobules I-III and lobule X of the vermal cerebellum using EPC9 and EPC10-USB amplifiers  
645 (HEKA Electronics, Lambrecht, Germany) and Patchmaster software (HEKA Electronics).  
646 Data were analyzed afterwards using Clampfit (Molecular Devices).

647

#### 648 **Compensatory eye movement recordings**

649 We subjected alert L7-TRPC3<sup>KO</sup> mice (aged 12-39 weeks) to compensatory eye movement  
650 recordings which were described in detail previously<sup>61</sup>. In short, mice were equipped with a  
651 pedestal under general anesthesia with isoflurane/O<sub>2</sub>. After a 2-3 days of recovery, mice were  
652 head-fixed with the body loosely restrained in a custom-made restrainer and placed in the  
653 center of a turntable (diameter: 63 cm) in the experimental set-up. A round screen (diameter  
654 60 cm) with a random dotted pattern ('drum') surrounded the mouse during the experiment.  
655 Compensatory eye movements were induced by sinusoidal rotation of the drum in light  
656 (OKR), rotation of the table in the dark (VOR) or the rotation of the table in the light (visually  
657 enhanced VOR, VVOR) with an amplitude of 5° at 0.1-1 Hz. Motor performance in response  
658 to these stimulations was evaluated by calculating the gain (eye velocity/stimulus velocity)  
659 and phase (eye to stimulus in degrees) of the response. Motor learning was studied by  
660 subjecting mice to mismatched visual and vestibular input. Rotating the drum (visual) and  
661 table (vestibular) simultaneously, in phase at 0.6 Hz (both with an amplitude of 5°, 5 x 10 min)  
662 in the light will induce an increase of the gain of the VOR (in the dark). Subsequently, VOR  
663 Phase reversal was tested by continuing the next days (day 2-5, keeping mice in the dark in  
664 between experiments) with in phase stimulation, but now with drum amplitudes of 7.5° (days  
665 2) and 10° (days 3, 4, and 5), while the amplitude of the turntable remained 5°. This resulted,

666 over days of training, in the reversal of the VOR direction, from a normal compensatory  
667 rightward eye movement (in the dark), when the head turns left, to a reversed response with a  
668 leftward eye movement, when the head moves left. At the end of the VOR phase reversal  
669 training the OKR was probed again and compared to the OKR before training, to examine  
670 OKR gain increase. VOR gain increase was evoked by subjecting mice to out of phase drum  
671 and table stimulation at 1.0 Hz (both with an amplitude of 1.6°). A CCD camera was fixed to  
672 the turntable in order to monitor the eyes of the mice. Eye movements were recorded with  
673 eye-tracking software (ETL-200, ISCAN systems, Burlington, NA, USA). For eye  
674 illumination during the experiments, two infrared emitters (output 600 mW, dispersion angle  
675 7°, peak wavelength 880 nm) were fixed to the table and a third emitter, which produced the  
676 tracked corneal reflection, was mounted to the camera and aligned horizontally with the  
677 optical axis of the camera. Eye movements were calibrated by moving the camera left-right  
678 (peak-to-peak 20°) during periods that the eye did not move<sup>62</sup>. Gain and phase values of eye  
679 movements were calculated using custom-made Matlab routines (MathWorks).

680

### 681 **Eyeblink conditioning**

682 For all procedures on eyeblink conditioning we refer to the study done previously<sup>63</sup>.  
683 L7-TRPC3<sup>KO</sup> mice, aged 16-25 weeks, were anesthetized with an isoflurane/oxygen mixture  
684 and surgically placed a so-called pedestal on the skull. After a 2-3 days' recovery, mice were  
685 head-fixed and suspended over a foam cylindrical treadmill on which they were allowed to  
686 walk freely (**Fig. 7b**). Before each session starting, a minuscule magnet (1.5x0.7x0.5mm) was  
687 placed on the left lower eyelid with superglue (cyanoacrylate) and an NVE GMR

688 magnetometer was positioned above the left upper eyelid. With this magnetic distance  
689 measurement technique (MDMT), we measured the exact positions of each individual mouse  
690 eyelid by analyzing the range from optimal closure to complete aperture. The CS was a green  
691 LED light (CS duration 280 ms, LED diameter 5 mm) placed 10 cm in front of the mouse's  
692 head. The US consisted of a weak air-puff applied to the eye (30 psi, 30 ms duration), which  
693 was controlled by an API MPPI-3 pressure injector, and delivered via a 27.5-gauge needle  
694 that was perpendicularly positioned at 0.5-1 cm from the center of the left cornea. The  
695 training consisted of 3 daily habituation sessions, 1 baseline measurement, 3 blocks of 5 daily  
696 acquisition sessions (each block was separated by 2 days of rest). During the habituation  
697 sessions, mice were placed in the setup for 30-45 minutes, during which the air puff needle  
698 (for US delivery) and green LED (for CS delivery) were positioned properly but no stimuli  
699 were presented. On the day of acquisition session 1, each animal first received 20 CS-only  
700 trials as a baseline measure, to establish that the CS did not elicit any reflexive eyelid closure.  
701 During each daily acquisition session, every animal received in total 200 paired CS-US trials,  
702 20 US only trials, and 20 CS only trials. These trials were presented in 20 blocks, each block  
703 consisted of 1 US only trial, 10 paired CS-US trials, and 1 CS only trial. Trials within the  
704 block were randomly distributed, but the CS only trial was always preceded by at least 2  
705 paired CS-US trials. The interval between the onset of CS and that of US was set at 250 ms.  
706 All experiments were performed at approximately the same time of day by the same  
707 experimenter. Individual eyeblink traces were analyzed automatically with custom computer  
708 software (LabVIEW or MATLAB). Trials with significant activity in the 500 ms pre-CS  
709 period ( $>7 \times \text{IQR}$ ) were regarded as invalid for further analysis. Valid trials were further

710 normalized by aligning the 500 ms pre-CS baselines and calibrating the signal so that the size  
711 of a full blink was 1. In valid normalized trials, all eyelid movements larger than 0.1 and with  
712 a latency to CR onset between 50-250 ms and a latency to CR peak of 100-250 ms (both  
713 relative to CS onset) were considered as conditioned responses (CRs). For CS only trials in  
714 the probe session we used the exact same criteria except that the latency to CR peak time was  
715 set at 100-500 ms after CS onset.

716

### 717 **Erasmus Ladder**

718 Mice aged 11-16 weeks were subjected to the Erasmus Ladder (Noldus, Wageningen,  
719 Netherlands). As described previously<sup>9</sup>, the Erasmus Ladder is a fully automated system  
720 consisting of a horizontal ladder between two shelter boxes. The ladder has 2 x 37 rungs for  
721 the left and right side. Rungs are placed 15 mm apart, with alternate rungs in a descended  
722 position, so as to create an alternating stepping pattern with 30 mm gaps. All rungs are  
723 equipped with touch sensors, which are activated when subject to a pressure corresponding to  
724 more than 4 grams. The sensors are continuously monitored to record the position and the  
725 walking pattern of the mouse. A single crossing of the Erasmus Ladder is recorded as a trial.  
726 In this study, each mouse underwent a daily session consisting of 42 trials, for five  
727 consecutive days. Motor performance was measured by counting step durations and  
728 percentages during a trial, including short steps (steps from one high rung to the next high  
729 rung), long steps (skipping one high rung), jumps (skipping two high rungs), lower steps (a  
730 step forward steps, but the paw is placed on a low rung), back steps (a step backward steps  
731 from one high rung to the previous high rung). All data were collected and processed by

732 ErasmusLadder 2.0 software (Noldus, Wageningen, Netherlands).

733

#### 734 **Statistics**

735 All values are shown as mean  $\pm$  s.d., unless stated otherwise. Inter-group comparisons were  
736 done by two-tailed Student's t test. For combined analysis of multiple sections, ANOVA for  
737 repeated measures was used to analyze eye-movement recording data; linear mixed-effect  
738 model analysis<sup>63</sup> (established in R version 1.1.442) was used to analyze eyeblink conditioning  
739 data. For a complete dataset, see **Supplementary Table 2-6**. All statistical analyses were  
740 performed using SPSS 20.0 software. Data was considered statistically significant if  $P < 0.05$ .

741 \*  $P < 0.05$ , \*\*  $P < 0.01$ , \*\*\*  $P < 0.001$ .

742

#### 743 **Data availability**

744 Data supporting the findings of this study are available from the corresponding author upon  
745 reasonable request.

746



## 747      **References**

- 748      1.      Ackermann, H., Vogel, M., Petersen, D. & Poremba, M. Speech deficits in ischaemic cerebellar  
749      lesions. *J Neurol* **239**, 223-227 (1992).
- 750      2.      Bodranghien, F., *et al.* Consensus Paper: Revisiting the Symptoms and Signs of Cerebellar  
751      Syndrome. *Cerebellum* **15**, 369-391 (2016).
- 752      3.      Raymond, J.L., Lisberger, S.G. & Mauk, M.D. The cerebellum: a neuronal learning machine?  
753      *Science* **272**, 1126-1131 (1996).
- 754      4.      De Zeeuw, C.I. & Yeo, C.H. Time and tide in cerebellar memory formation. *Curr Opin*  
755      *Neurobiol* **15**, 667-674 (2005).
- 756      5.      Yang, Y. & Lisberger, S.G. Purkinje-cell plasticity and cerebellar motor learning are graded by  
757      complex-spike duration. *Nature* **510**, 529-532 (2014).
- 758      6.      Hirata, Y. & Highstein, S.M. Analysis of the discharge pattern of floccular Purkinje cells in  
759      relation to vertical head and eye movement in the squirrel monkey. *Prog Brain Res* **124**,  
760      221-232 (2000).
- 761      7.      Witter, L., *et al.* Strength and timing of motor responses mediated by rebound firing in the  
762      cerebellar nuclei after Purkinje cell activation. *Front Neural Circuits* **7**, 133 (2013).
- 763      8.      Thach, W.T., Goodkin, H.P. & Keating, J.G. The cerebellum and the adaptive coordination of  
764      movement. *Annu Rev Neurosci* **15**, 403-442 (1992).
- 765      9.      Vinueza Veloz, M.F., *et al.* Cerebellar control of gait and interlimb coordination. *Brain Struct*  
766      *Funct* **220**, 3513-3536 (2015).
- 767      10.      Zhou, H., *et al.* Cerebellar modules operate at different frequencies. *Elife* **3**, e02536 (2014).
- 768      11.      Xiao, J., *et al.* Systematic regional variations in Purkinje cell spiking patterns. *PLoS One* **9**,

- 769 e105633 (2014).
- 770 12. Brochu, G., Maler, L. & Hawkes, R. Zebrin II: a polypeptide antigen expressed selectively by  
771 Purkinje cells reveals compartments in rat and fish cerebellum. *J Comp Neurol* **291**, 538-552  
772 (1990).
- 773 13. Ahn, A.H., Dziennis, S., Hawkes, R. & Herrup, K. The cloning of zebrin II reveals its identity  
774 with aldolase C. *Development* **120**, 2081-2090 (1994).
- 775 14. Ruigrok, T.J. Ins and outs of cerebellar modules. *Cerebellum* **10**, 464-474 (2011).
- 776 15. Sugihara, I. & Quay, P.N. Identification of aldolase C compartments in the mouse cerebellar  
777 cortex by olivocerebellar labeling. *J Comp Neurol* **500**, 1076-1092 (2007).
- 778 16. Graham, D.J. & Wylie, D.R. Zebrin-immunopositive and -immunonegative stripe pairs  
779 represent functional units in the pigeon vestibulocerebellum. *J Neurosci* **32**, 12769-12779  
780 (2012).
- 781 17. De Zeeuw, C.I. & Ten Brinke, M.M. Motor Learning and the Cerebellum. *CSHP Biol* **7**, a021683  
782 (2015).
- 783 18. Altschuler, S.J. & Wu, L.F. Cellular heterogeneity: do differences make a difference? *Cell* **141**,  
784 559-563 (2010).
- 785 19. Apps, R., *et al.* Cerebellar Modules and Their Role as Operational Cerebellar Processing Units.  
786 *Cerebellum* (2018).
- 787 20. Cerminara, N.L., Lang, E.J., Sillitoe, R.V. & Apps, R. Redefining the cerebellar cortex as an  
788 assembly of non-uniform Purkinje cell microcircuits. *Nat Rev Neurosci* **16**, 79-93 (2015).
- 789 21. Wadiche, J.I. & Jahr, C.E. Patterned expression of Purkinje cell glutamate transporters controls  
790 synaptic plasticity. *Nat Neurosci* **8**, 1329-1334 (2005).

- 791 22. Perkins, E.M., *et al.* Loss of cerebellar glutamate transporters EAAT4 and GLAST differentially  
792 affects the spontaneous firing pattern and survival of Purkinje cells. *Hum Mol Genet* (2018).
- 793 23. Miyata, M., *et al.* Deficient long-term synaptic depression in the rostral cerebellum correlated  
794 with impaired motor learning in phospholipase C beta4 mutant mice. *Eur J Neurosci* **13**,  
795 1945-1954 (2001).
- 796 24. Hashimoto, K., Miyata, M., Watanabe, M. & Kano, M. Roles of phospholipase Cbeta4 in  
797 synapse elimination and plasticity in developing and mature cerebellum. *Mol Neurobiol* **23**,  
798 69-82 (2001).
- 799 25. Sarna, J.R., Marzban, H., Watanabe, M. & Hawkes, R. Complementary stripes of  
800 phospholipase Cbeta3 and Cbeta4 expression by Purkinje cell subsets in the mouse  
801 cerebellum. *J Comp Neurol* **496**, 303-313 (2006).
- 802 26. Ohtani, Y., *et al.* The synaptic targeting of mGluR1 by its carboxyl-terminal domain is crucial  
803 for cerebellar function. *J Neurosci* **34**, 2702-2712 (2014).
- 804 27. Mateos, J.M., *et al.* Parasagittal compartmentalization of the metabotropic glutamate  
805 receptor mGluR1b in the cerebellar cortex. *Eur J Anat.* **5**, 15-21 (2001).
- 806 28. Hartmann, J., *et al.* TRPC3 channels are required for synaptic transmission and motor  
807 coordination. *Neuron* **59**, 392-398 (2008).
- 808 29. Sanchez, M., *et al.* Compartmentation of the rabbit cerebellar cortex. *J Comp Neurol* **444**,  
809 159-173 (2002).
- 810 30. Mostofi, A., *et al.* Electrophysiological localization of eyeblink-related microzones in rabbit  
811 cerebellar cortex. *J Neurosci* **30**, 8920-8934 (2010).
- 812 31. Hesslow, G. Inhibition of classically conditioned eyeblink responses by stimulation of the

- 813 cerebellar cortex in the decerebrate cat. *J Physiol* **476**, 245-256 (1994).
- 814 32. Becker, E.B., *et al.* A point mutation in TRPC3 causes abnormal Purkinje cell development and  
815 cerebellar ataxia in moonwalker mice. *PNAS* **106**, 6706-6711 (2009).
- 816 33. Barski, J., Dethleffsen K & M, M. Cre recombinase expression in cerebellar Purkinje cells.  
817 *Genesis* **28**, 93-98 (2000).
- 818 34. Raman, I.M. & Bean, B.P. Ionic currents underlying spontaneous action potentials in isolated  
819 cerebellar Purkinje neurons. *J Neurosci* **19**, 1663-1674 (1999).
- 820 35. Womack, M. & Khodakhah, K. Active contribution of dendrites to the tonic and trimodal  
821 patterns of activity in cerebellar Purkinje neurons. *J Neurosci* **22**, 10603-10612 (2002).
- 822 36. Wu, B. & Schonewille, M. Targeted Electrophysiological Recordings In Vivo in the Mouse  
823 Cerebellum. *Extracellular Recording Approaches (ed, Roy Sillitoe)*, Ch.2, 19-37 (Humana Press,  
824 New York, 2018).
- 825 37. Zhou, H., *et al.* Differential Purkinje cell simple spike activity and pausing behavior related to  
826 cerebellar modules. *J Neurophysiol* **113**, 2524-2536 (2015).
- 827 38. Chaumont, J., *et al.* Clusters of cerebellar Purkinje cells control their afferent climbing fiber  
828 discharge. *Proc Natl Acad Sci U S A* **110**, 16223-16228 (2013).
- 829 39. Simpson, J.I., Wylie, D.R.W. & De Zeeuw, C.I. On climbing fiber signals and their  
830 consequence(s). *Behavioral and Brain Sciences* **19**, 384-398 (1996).
- 831 40. Sekerkova, G., *et al.* Early onset of ataxia in moonwalker mice is accompanied by complete  
832 ablation of type II unipolar brush cells and Purkinje cell dysfunction. *J Neurosci* **33**,  
833 19689-19694 (2013).
- 834 41. Apps, R. & Hawkes, R. Cerebellar cortical organization: a one-map hypothesis. *Nat Rev*

- 835 *Neurosci* **10**, 670-681 (2009).
- 836 42. Marzban, H. & Hawkes, R. On the architecture of the posterior zone of the cerebellum.  
837 *Cerebellum* **10**, 422-434 (2011).
- 838 43. Sun, Y., Sukumaran, P., Bandyopadhyay, B.C. & Singh, B.B. Physiological Function and  
839 Characterization of TRPCs in Neurons. *Cells* **3**, 455-475 (2014).
- 840 44. Becker, E.B. The Moonwalker mouse: new insights into TRPC3 function, cerebellar  
841 development, and ataxia. *Cerebellum* **13**, 628-636 (2014).
- 842 45. Hartmann, J., Henning, H.A. & Konnerth, A. mGluR1/TRPC3-mediated Synaptic Transmission  
843 and Calcium Signaling in Mammalian Central Neurons. *Cold Spring Harb Perspect Biol*  
844 **3**(2011).
- 845 46. Chaumont, J., *et al.* Clusters of cerebellar Purkinje cells control their afferent climbing fiber  
846 discharge. *PNAS* **110**, 16223-16228 (2013).
- 847 47. ten Brinke, M.M., *et al.* Evolving Models of Pavlovian Conditioning: Cerebellar Cortical  
848 Dynamics in Awake Behaving Mice. *Cell Rep* **13**, 1977-1988 (2015).
- 849 48. Jirenhed, D.A., Bengtsson, F. & Hesslow, G. Acquisition, extinction, and reacquisition of a  
850 cerebellar cortical memory trace. *J Neurosci* **27**, 2493-2502 (2007).
- 851 49. Johansson, F., *et al.* Memory trace and timing mechanism localized to cerebellar Purkinje cells.  
852 *Proc Natl Acad Sci U S A* **111**, 14930-14934 (2014).
- 853 50. Fujita, H., *et al.* Detailed expression pattern of aldolase C (Aldoc) in the cerebellum, retina  
854 and other areas of the CNS studied in Aldoc-Venus knock-in mice. *PLoS One* **9**, e86679 (2014).
- 855 51. Voges, K., *et al.* Mechanisms underlying vestibulo-cerebellar motor learning in mice depend  
856 on movement direction. *J Physiol* **595**, 5301-5326 (2017).

- 857 52. Kim, S.J. TRPC3 channel underlies cerebellar long-term depression. *Cerebellum* **12**, 334-337  
858 (2013).
- 859 53. Schonewille, M., *et al.* Reevaluating the role of LTD in cerebellar motor learning. *Neuron* **70**,  
860 43-50 (2011).
- 861 54. Schreurs, B.G., Tomsic, D., Gusev, P.A. & Alkon, D.L. Dendritic excitability microzones and  
862 occluded long-term depression after classical conditioning of the rabbit's nictitating  
863 membrane response. *J Neurophysiol* **77**, 86-92 (1997).
- 864 55. Ohtsuki, G., Piochon, C., Adelman, J.P. & Hansel, C. SK2 channel modulation contributes to  
865 compartment-specific dendritic plasticity in cerebellar Purkinje cells. *Neuron* **75**, 108-120  
866 (2012).
- 867 56. Ruigrok, T.J., Pijpers, A., Goedknecht-Sabel, E. & Coulon, P. Multiple cerebellar zones are  
868 involved in the control of individual muscles: a retrograde transneuronal tracing study with  
869 rabies virus in the rat. *Eur J Neurosci* **28**, 181-200 (2008).
- 870 57. Diedrichsen, J., Criscimagna-Hemminger, S.E. & Shadmehr, R. Dissociating timing and  
871 coordination as functions of the cerebellum. *J Neurosci* **27**, 6291-6301 (2007).
- 872 58. Shadmehr, R. Distinct neural circuits for control of movement vs. holding still. *J Neurophysiol*  
873 **117**, 1431-1460 (2017).
- 874 59. Renier, N., *et al.* iDISCO: a simple, rapid method to immunolabel large tissue samples for  
875 volume imaging. *Cell* **159**, 896-910 (2014).
- 876 60. Peter, S., *et al.* Dysfunctional cerebellar Purkinje cells contribute to autism-like behaviour in  
877 Shank2-deficient mice. *Nat Commun* **7**, 12627 (2016).
- 878 61. Schonewille, M., *et al.* Purkinje cell-specific knockout of the protein phosphatase PP2B

- 879           impairs potentiation and cerebellar motor learning. *Neuron* **67**, 618-628 (2010).
- 880   62.    Stahl, J.S. Using eye movements to assess brain function in mice. *Vision Res* **44**, 3401-3410
- 881           (2004).
- 882   63.    Boele, H.J., *et al.* Impact of parallel fiber to Purkinje cell long-term depression is unmasked in
- 883           absence of inhibitory input. *Sci Adv* **4**, eaas9426 (2018).
- 884
- 885
- 886

## 887 Acknowledgements

888 We kindly thank Laura Post for mouse breeding; Nadia Khosravinia for help with behavior  
889 experiment; Joshua J. White and Dick Jaarsma for discussions and comments on the  
890 manuscript. This work was supported by an ERC starter grant (ERC-Stg #680235; MS),  
891 China Scholarship Council (#201306230130; BW), the Netherlands Organization for  
892 Scientific Research (NWO-ALW; CIDZ), the Dutch Organization for Medical Sciences  
893 (ZonMW; CIDZ), ERC-adv and ERC-POC (CIDZ), and the Center for Integrated Protein  
894 Science Munich (CIPSM; JH).

895

## 896 Author contributions

897 B.W. and M.S. designed all the experiments and wrote the manuscript; B.W. performed and  
898 analyzed the *in vivo* and *in vitro* electrophysiology experiments, analyzed the *in vivo*  
899 two-photon experiments and the eye-movement behavior experiments; F.B. performed and  
900 analyzed the immunohistochemistry and iDISCO experiments; A.B.W performed the *in vivo*  
901 two-photon experiments; C.O. conducted and analyzed the Western Blot; Y.A. and R.J.P  
902 supported for light sheet imaging; J.H. supplied the TRPC3<sup>fl/fl</sup> mice; E.B. supplied the  
903 TRPC3<sup>Mwk</sup> mouse; HJ.B analyzed the eyeblink conditioning data; C.I.D.Z. provided major  
904 revisions to the manuscript and guided the project. M.S. initiated the project and coordinated  
905 collaborations between groups. All authors discussed the results and implications and  
906 commented on the manuscript.

907

## 908 Additional information



909 **Supplementary information** linked to this paper is available on *Nature Communications'*  
910 website.

911

912 **Competing interests**

913 The authors declare no competing financial interests.

914

## 915 **Figure legends**

### 916 **Fig.1 | TRPC3 is predominantly expressed in the cerebellum in a zebrin-related**

917 **pattern. a**, Representative image and magnification (right) of sagittal cryosection of an

918 adult mouse brain stained with anti-TRPC3. Inset, plane of section. **b**, Coronal

919 immunofluorescence images with anti-TRPC3 (red), anti-aldolase C (green) and

920 anti-calbindin (blue) staining of the cerebellar cortex (left), with magnifications (right).

921 TRPC3 is expressed in the cerebellar PCs and UBCs (triangles), in a pattern that in the

922 vermis complements that of zebrin and appears more uniform in the hemispheres. Inset,

923 plane of section. **c**, Individual images of a light sheet imaging-based reconstruction of a

924 mouse brain cleared with iDISCO and stained with anti-TRPC3. Three different planes

925 (insets) of whole cerebellum show sagittal compartmentations across lobules. **d**,

926 Immunoblots of TRPC3 by using synaptic protein extraction protocol on the anterior (top)

927 and posterior (bottom) cerebellum. TRPC3 is present in the homogenate (S1) and enriched

928 in the membrane (P1) and synaptosomes (P2), but not in the cytosol (S2). I-X, cerebellar

929 lobules I-X; Cr II, Crus II; PM, paramedian lobule; Cop, Copula Pyramidis; gcl, granule

930 cell layer; pcl, Purkinje cell layer; ml, molecular layer; D, dorsal; V, ventral; M, medial; L,

931 lateral.

### 932 **Fig.2 | Differential controls of PCs firing properties by TRPC3 *in vitro*. a**, Schematic

933 drawing of TRPC3 channel function in control (black), gain-of-function (TRPC3<sup>Mwk</sup>, red) and

934 loss-of-function (L7-TRPC3<sup>KO</sup>, green) mice. **b**, Schematic approach illustrating of PCs

935 (right circle, dashed lines) recording *in vitro*, in acute sagittal slices (left). **c,d**,

936 Representative traces of cell-attached PC recordings (top) and corresponding inter spike

937 interval (ISI) distributions (middle) in a Z- PC (left) and a Z+ PC (right) of TRPC3<sup>Mwk</sup> (c)  
938 and L7-TRPC3<sup>KO</sup> (d) mice. Z- PCs were affected in TRPC3<sup>Mwk</sup> (c, light-red, n=15  
939 cells/N=4 mutant mice vs. n=11 cells/N=2 littermate controls,  $t_{19}=-2.43$ ,  $P=0.025$  and in  
940 L7-TRPC3<sup>KO</sup> mice (d, light-green, n=40/N=6 mutants vs. n=43/N=5 controls,  $t_{81}=2.69$ ,  
941  $P=0.009$ ). No differences in the firing rate of Z+ PCs in TRPC3<sup>Mwk</sup> (c, dark-red, n=13/N=4  
942 mutants vs. n=10/N=2 controls,  $t_{21}=0.242$ ,  $P=0.811$ ) and L7-TRPC3<sup>KO</sup> mice (d, dark-green,  
943 n=36/N=10 mutants vs. n=35/N=4 controls,  $t_{64}=0.937$ ,  $P=0.352$ ). e, Whole-cell patch-clamp  
944 recordings in slice from PCs of L7-TRPC3<sup>KO</sup> and control mice were used to test intrinsic  
945 excitability, by keeping cells at a holding potential of -65 mV and evoking action potentials  
946 by current steps of 100 pA (example, top). Top, exemplary traces evoked by current injection  
947 at 600 pA. Bottom, Input-output curves from whole-cell recordings of L7-TRPC3<sup>KO</sup> mice  
948 of Z- PCs (left, n=17/N=5 mutants vs n=17/N=5 controls,  $t_{32}=-2.20$ ,  $P=0.035$ ) and Z+ PCs  
949 (right, n=12/N=5 mutants vs n=12/N=4 controls,  $t_{22}=-0.95$ ,  $P=0.354$ ). gcl, granule cell  
950 layer; pcl, Purkinje cell layer; ml, molecular layer. c-d, data are represented as mean  $\pm$  s.d.;  
951 e, data are represented as mean  $\pm$  s.e.m.. For values see **Supplementary Table 2**.

952

953 **Fig.3 | *In vivo* simple spike firing rate of Z-, but not Z+ PCs is controlled by TRPC3**

954 a, Schematic illustration of extracellular recording configuration *in vivo*. PF, parallel fiber;  
955 CF, climbing fiber; MF, mossy fiber; GC, granule cell. b, Representative sagittal cerebellar  
956 section with recording sites labelled by BDA injection, in lobule II (black arrow) and X  
957 (white arrow). c, Representative example traces (left) and ISI distributions (right) of a Z-  
958 PC (top) and a Z+ PC (bottom) in gain-of-function TRPC3<sup>Mwk</sup> mice. d, PC simple spike

959 firing rate recorded *in vivo* in TRPC3<sup>Mwk</sup> mice compared to control littermates, for the Z-  
960 lobules I-III (light-red, n=36/N=7 mutants vs. n=40/N=6 controls,  $t_{60}=-4.58$ ,  $P<0.001$ ) and  
961 the Z+ lobule X (dark-red, n=20/N=6 mutants vs. n=24/N=5 controls,  $t_{42}=-1.47$ ,  $P=0.148$ ).  
962 **e**, Representative example traces (left) and ISI distributions (right) in a Z- PC (top) and a  
963 Z+ PC (bottom) of loss-of-function L7-TRPC3<sup>KO</sup> mice. **f**, PC simple spike firing rate of  
964 L7-TRPC3<sup>KO</sup> mice compared to controls, for Z- lobules I-III (light-green, n=30/N=7  
965 mutants vs. n=26/N=8 controls,  $t_{54}=2.88$ ,  $P=0.006$ ) and in Z+ lobule X (dark-green,  
966 n=32/N=8 mutants vs. n=24/N=6 controls,  $t_{54}=-0.053$ ,  $P=0.958$ ). Data are represented as  
967 mean  $\pm$  s.d., for values see **Supplementary Table 3**.

968

969 **Fig.4 | TRPC3 effects follow zebrin-identity and are not developmental.** **a**, Schematic  
970 experimental setup for two-photon imaging-based targeted PC recordings, *in vivo*. **b**,  
971 Sagittal view of cerebellum (schematic, top) indicating the recording region in the ellipse  
972 (bottom). Representative images (right) show the visualization of Z+ bands (strong green)  
973 in an awake L7-TRPC3<sup>KO</sup>-EAAT4<sup>eGFP</sup> mouse, with recording electrodes (red) positioned in  
974 Z- (left) and Z+ (right) bands. **c**, Representative firing traces (left) and ISI distributions  
975 (right) in a Z- PC (top) and a Z+ PC (bottom) of loss-of-function L7-TRPC3<sup>KO</sup>-EAAT4<sup>eGFP</sup>  
976 mice (blue) and control littermates (no Cre; gray). **d**, Average simple spike firing rate of  
977 PCs recorded from adjacent modules of L7-TRPC3<sup>KO</sup>-EAAT4<sup>eGFP</sup> mice and those in control  
978 littermates. Comparison for Z- PCs (light-blue, n=16/N=3 mutants vs. n=14/N=2 controls,  
979  $t_{28}=3.99$ ,  $P<0.001$ ), and Z+ PCs (dark-blue, n=12/N=3 mutants vs. n=12/N=2 controls,  
980  $t_{21}=-0.550$ ,  $P=0.588$ ). **e-f**, Intraperitoneal tamoxifen injections for five days (D<sub>1-5</sub>) to trigger

981 TRPC3 gene ablation solely in PCs (using L7 promotor) in adult L7<sup>CreERT2</sup>-TRPC3<sup>fl/fl</sup> mice.  
982 Open triangles indicate *loxP* sites. PC *in vivo* extracellular activity was recorded four  
983 weeks later (D<sub>29-31</sub>) in L7-TRPC3<sup>ckO</sup> mice (orange). TRPC3 deletion was confirmed after  
984 experiment by confocal image using anti-TRPC3 staining (f). g, Representative firing  
985 traces (left) and ISI distributions (right) in a Z<sup>-</sup> PC (top) and a Z<sup>+</sup> PC (bottom) of  
986 L7-TRPC3<sup>ckO</sup> mice. h, Simple spike firing rate *in vivo* in L7-TRPC3<sup>ckO</sup> and control mice  
987 (no Cre). Comparison for Z<sup>-</sup> PCs (light-orange, n=30/N=4 mutants vs. n=25/N=4 controls,  
988  $t_{53}=5.05$ ,  $P<0.001$ ), and Z<sup>+</sup> PCs (dark-orange, n=29/N=4 mutants vs. n=17/N=3 controls,  
989  $t_{44}=1.21$ ,  $P=0.234$ ). Sim, simplex lobule; IV-VI, lobules IV-VI, R, rostral, C, caudal; L,  
990 lateral, M, medial. Data are represented as mean  $\pm$  s.d., for values see **Supplementary**  
991 **Table 3.**

992

993 **Fig.5 | Complex spikes and complex spike - simple spike interaction are affected by**  
994 **TRPC3 mutations.**

995 a, Representative PC recording traces and complex spikes shape of Z<sup>-</sup> (light black) and Z<sup>+</sup>  
996 (dark black) PCs in the control mice. b, Top half, comparison of complex spike firing rates  
997 in TRPC3<sup>Mwk</sup> (red) and L7-TRPC3<sup>KO</sup> (green) mice versus their respective littermate  
998 controls for Z<sup>-</sup> PCs (TRPC3<sup>Mwk</sup>:  $t_{68}=2.68$ ,  $P=0.009$ ; L7-TRPC3<sup>KO</sup>:  $t_{54}=2.50$ ,  $P=0.016$ ) and  
999 Z<sup>+</sup> PCs (TRPC3<sup>Mwk</sup>:  $t_{42}=1.56$ ,  $P=0.126$ ; L7-TRPC3<sup>KO</sup>:  $t_{54}=1.41$ ,  $P=0.164$ ). Bottom half,  
1000 comparison of complex spike firing rates in L7-TRPC3<sup>KO</sup>-EAAT4<sup>eGFP</sup> (blue) and  
1001 L7-TRPC3<sup>ckO</sup> (orange) mice versus their respective controls for Z<sup>-</sup> PCs  
1002 (L7-TRPC3<sup>KO</sup>-EAAT4<sup>eGFP</sup>:  $t_{28}=3.49$ ,  $P=0.002$ ; L7-TRPC3<sup>ckO</sup>:  $t_{53}=-0.940$ ,  $P=0.352$ ) and Z<sup>+</sup>

1003 PCs (L7-TRPC3<sup>KO</sup>-EAAT4<sup>eGFP</sup>:  $t_{20}=3.03$ ,  $P=0.007$ ; L7-TRPC3<sup>ckO</sup>:  $t_{44}=0.448$ ,  $P=0.656$ ). **c**,  
1004 Raster plots of simple spike activity around the occurrence of each complex spike (-100 to  
1005 +300 ms). These peri-complex spike time histograms can, based on post-complex spike  
1006 activity, be divided into one of four types: normal (no change), facilitation, suppression  
1007 and oscillation. **d**, The distribution of post-complex spike response types for Z- and Z+  
1008 PCs, in TRPC3<sup>Mwk</sup>, L7-TRPC3<sup>KO</sup>, L7-TRPC3<sup>KO</sup>-EAAT4<sup>eGFP</sup> and L7-TRPC3<sup>ckO</sup> mice. Data  
1009 are represented as mean  $\pm$  s.d., for values see **Supplementary Table 3**.

1010

1011 **Fig.6 | PC-specific deletion of TRPC3 does not affect Z+-dependent VOR adaptation.**

1012 **a**, Cerebellar circuitry controlling compensatory eye movements and their adaptation. PCs  
1013 in the flocculus (FL) receive vestibular and visual input via the mossy fiber (MF) - parallel  
1014 fiber (PF) system (green) and climbing fiber input (CF, red) from the inferior olive (IO),  
1015 indicating retinal slip. These two inputs converge on PCs, which influence eye movements  
1016 via the vestibular nuclei (VN) and the oculomotor (OM) neurons. PN, pontine nuclei; GC,  
1017 granule cell. **b**, Schematic illustration of eye movement recording setup. Mice are  
1018 head-fixed in the center of a turntable for vestibular stimulation and surrounded by a random  
1019 dotted pattern ('drum') for visual stimulation. A CCD camera was used for infrared (IR)  
1020 video-tracking of the left eye. **c**, Top, examples of nasal (N) and temporal (T) eye positions.  
1021 Red circles, pupil fit; black cross, corneal reflection (CR); white cross, pupil center.  
1022 Bottom, example trace of eye position (grey) with drum position (red), during stimulation  
1023 at an amplitude of 5° and frequency of 0.6 Hz. **d**, L7-TRPC3<sup>KO</sup> and control mice were  
1024 subjected to six 5-min training sessions with mismatched in-phase visual and vestibular

1025 stimulation (in light, see insets), aimed at decreasing the VOR gain (probed in the dark  
1026 before, between and after sessions). **e**, Similar, but now mice were trained with  
1027 out-of-phase stimulation, aimed at increasing VOR gain. **f**, Re-recording of OKR gain  
1028 following the VOR phase reversal training (see **g-h**) to test OKR gain increase (compare to  
1029 **Supplementary Fig. 12, left**). **g**, Multiple-day training using in-phase mismatch  
1030 stimulation (see inset in **h**) aimed at reversing the direction of the VOR (quantified as a  
1031 reversal of the phase). Representative eye position recordings of VOR before (top) and  
1032 after (bottom) training. **h**, Results of five days of VOR phase reversal training, probed by  
1033 recording VOR (in the dark before, between and after sessions) with mice kept in the dark  
1034 in overnight. Data are represented as mean  $\pm$  s.e.m., N=11 mutants versus N=13 controls,  
1035 all  $P > 0.05$ , ANOVA for repeated measurements. See **Supplementary Table 4** for values.

1036

1037 **Fig.7 | Eyeblick conditioning, linked to Z- modules is delayed in L7-TRPC3<sup>KO</sup> mice. a**,  
1038 Cerebellar circuitry controlling eyeblick conditioning. PCs in the paravermal region  
1039 around the primary fissure receive inputs carrying sensory information from e.g. the  
1040 pontine nucleus (PN) through the MF-PF pathway and the error signal from the inferior  
1041 olive (IO) through the climbing fibers (CF). These PCs in turn influence eyelid muscles via  
1042 the anterior interposed nucleus (AIN) and motor nuclei (MN). **b**, Schematic illustration of  
1043 eyeblick conditioning setup. Head fixed mice on a freely moving treadmill, are presented a  
1044 green LED light (conditional stimulus, CS) followed several hundred milliseconds later by  
1045 a weak air-puff on the eye (unconditional stimulus, US). As a result of repeated CS-US  
1046 pairings, mice will eventually learn to close their eye in response to the CS, which is called

1047 the conditioned response (CR). Eyelid movements were recorded with the magnetic  
1048 distance measurement technique (MDMT). **c**, Comparison of fraction of eyelid closure  
1049 between controls (left) and L7-TRPC3<sup>KO</sup> mice (right). Top, session averages (thin-lines)  
1050 per mouse and overall average (thick-lines) for the first 5 days. Insets: mouse eye video  
1051 captures show eyelid closure ranging from 0 (fully-open) to 1 (fully-closed). Bottom,  
1052 waterfall plot of the averaged eyeblink trace during CS-only trials for the 15 daily sessions.  
1053 **d**, The CR percentage and CR amplitude for L7-TRPC3<sup>KO</sup> mice initially have an  
1054 significantly slower acquisition but eventually reach the same levels as control littermates.  
1055 Data are represented as mean  $\pm$  s.e.m., N=15 mutants versus N=15 controls, *P* values were  
1056 all FDR corrected for multiple comparisons, see **Supplementary Table 5** for values and  
1057 statistics.



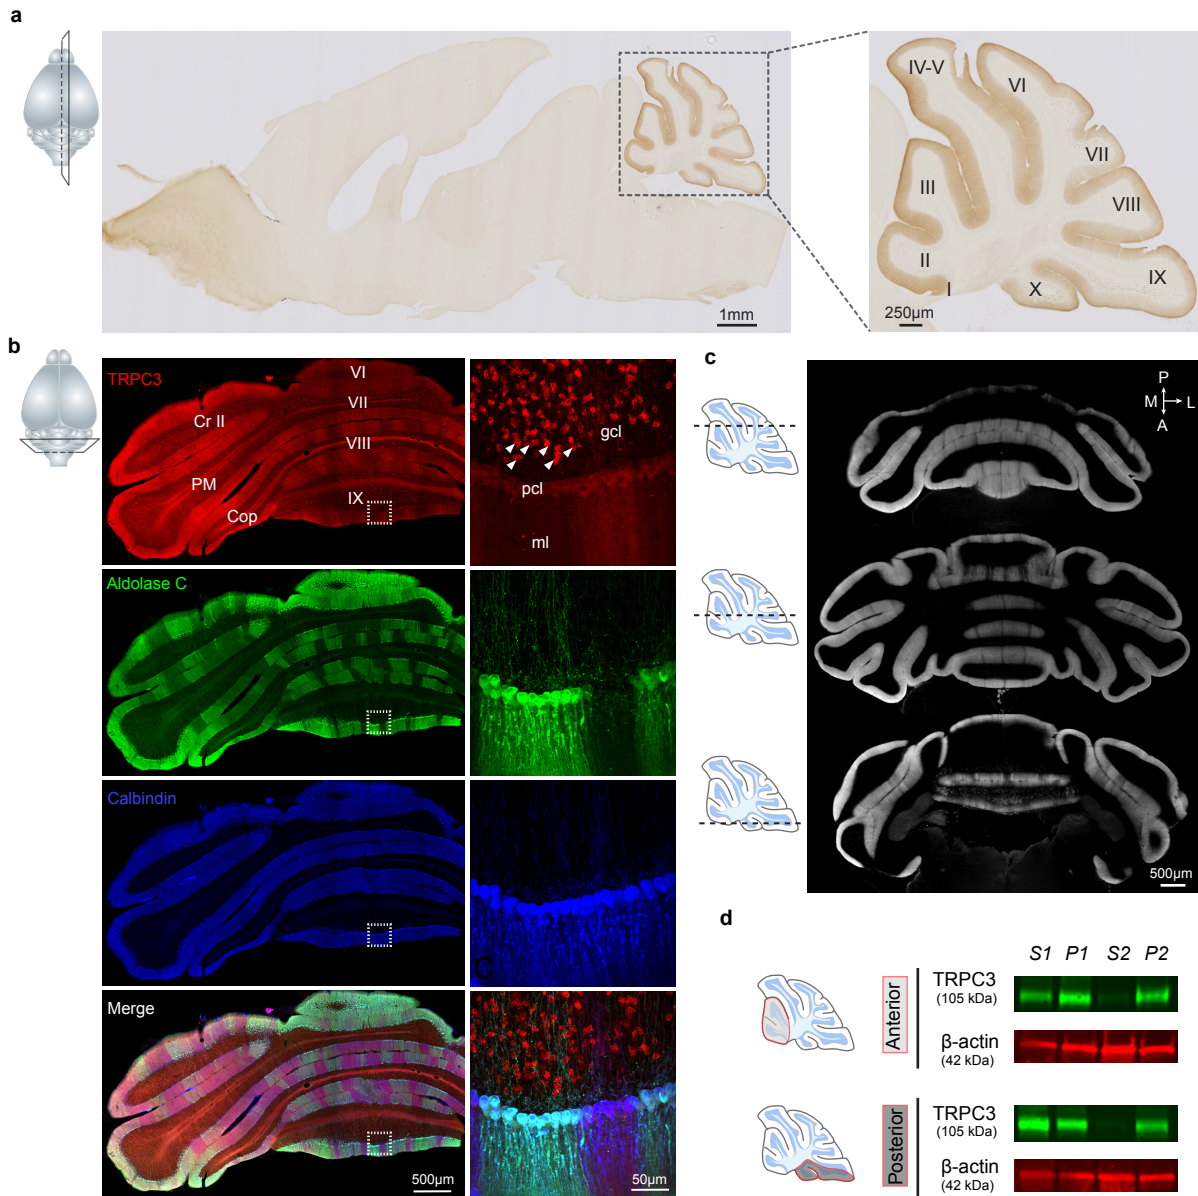

**Fig. 1**

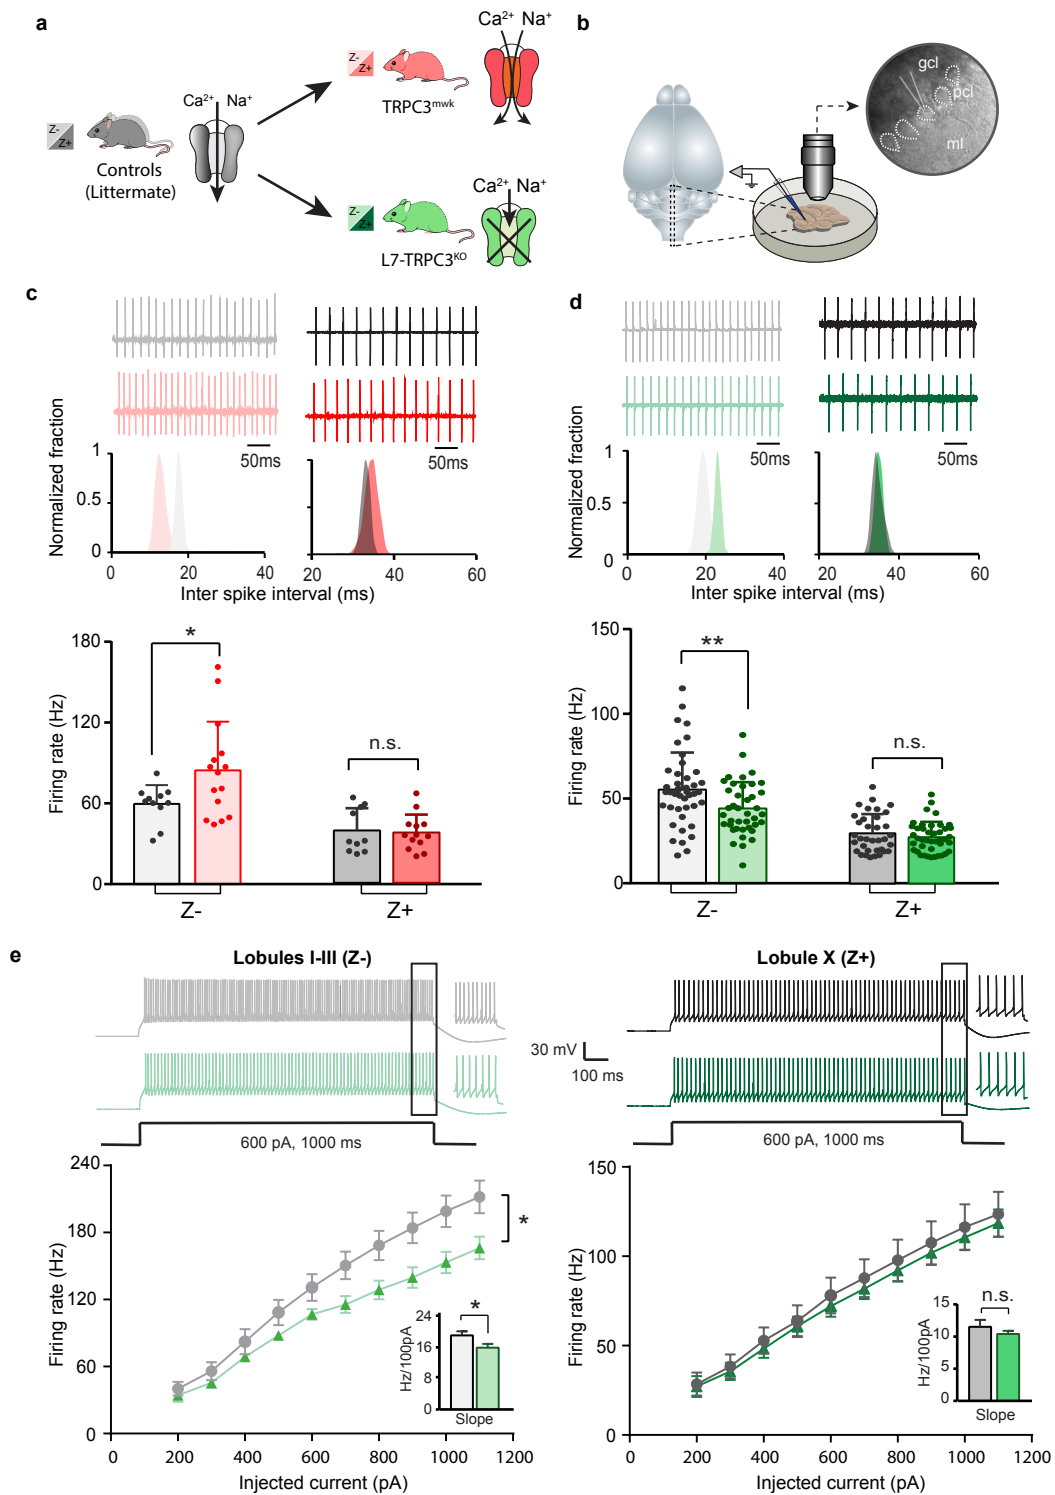

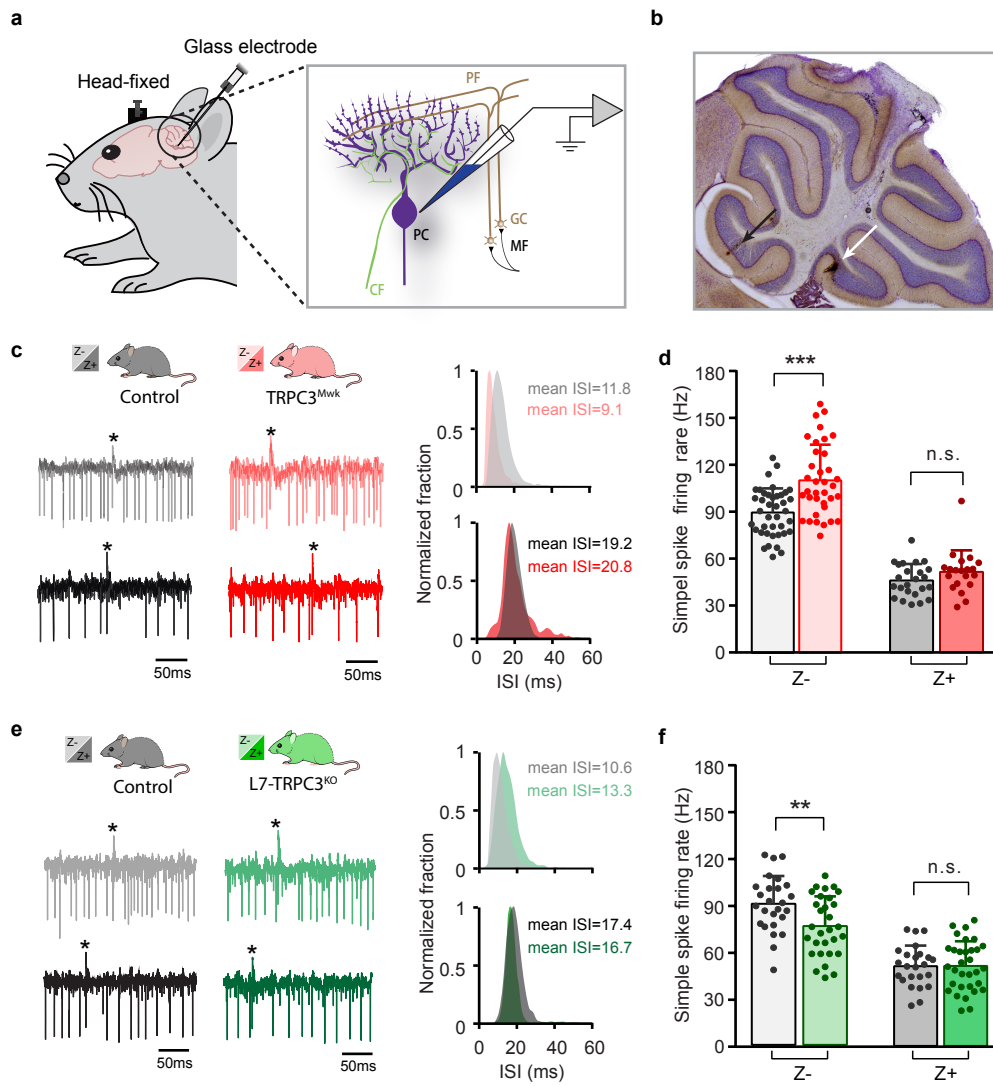

**Fig. 3**

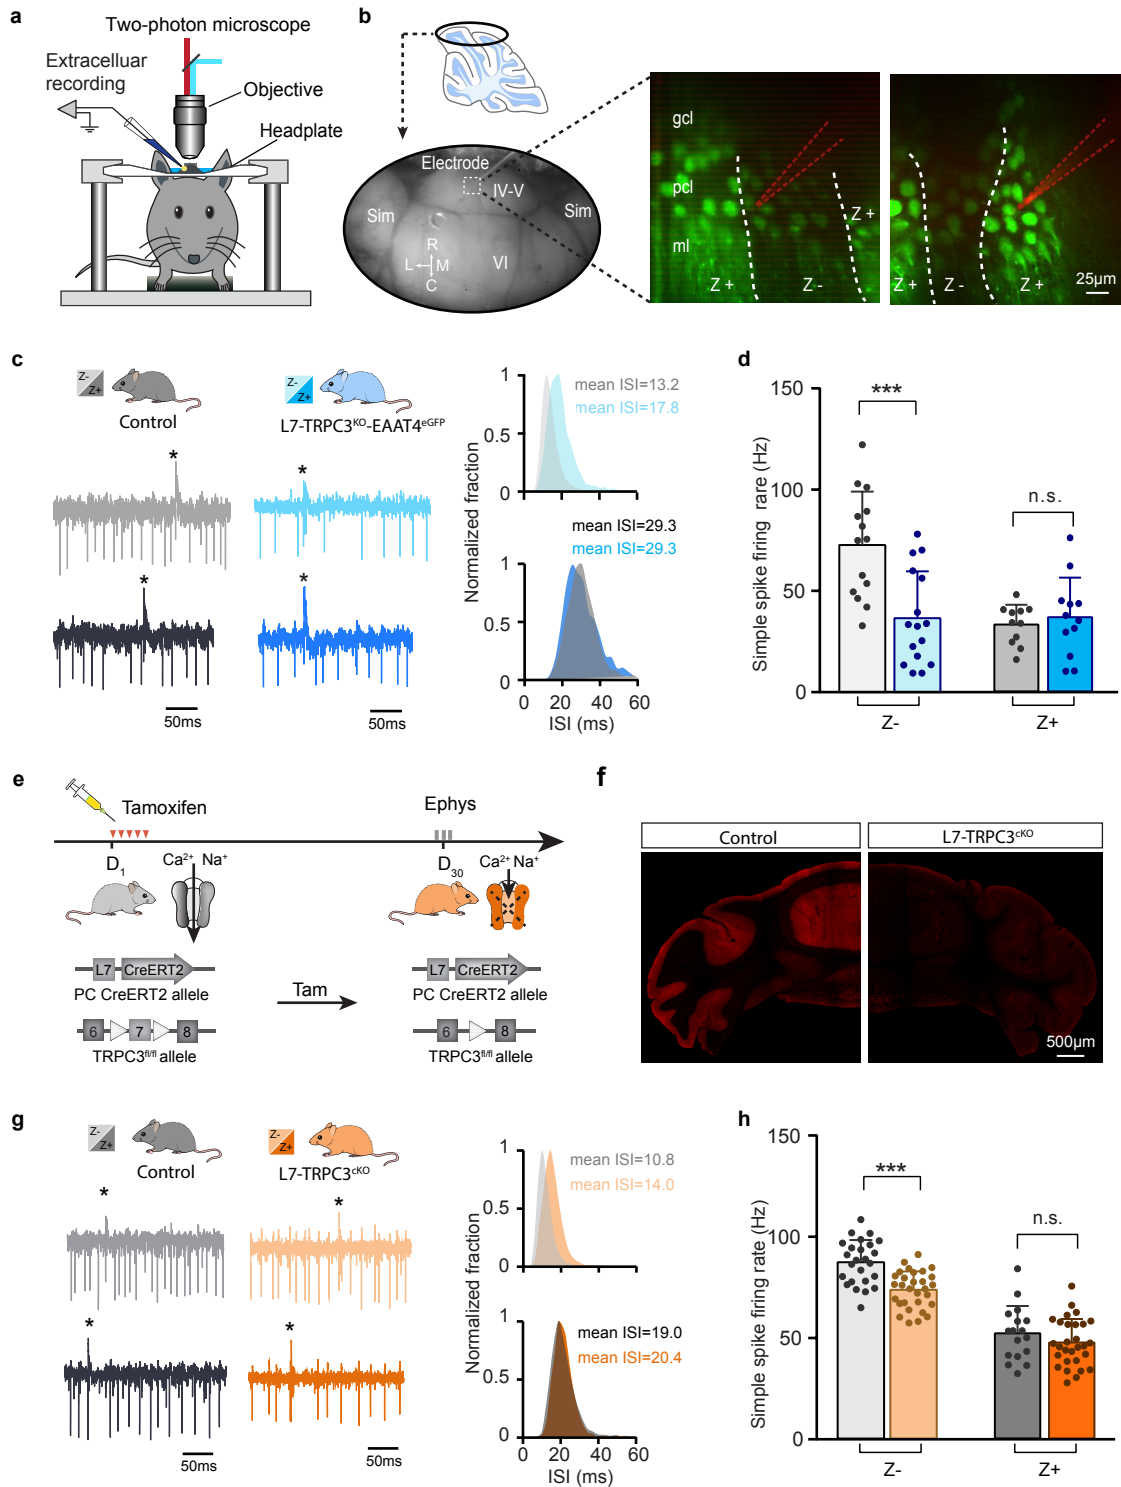

**Fig. 4**

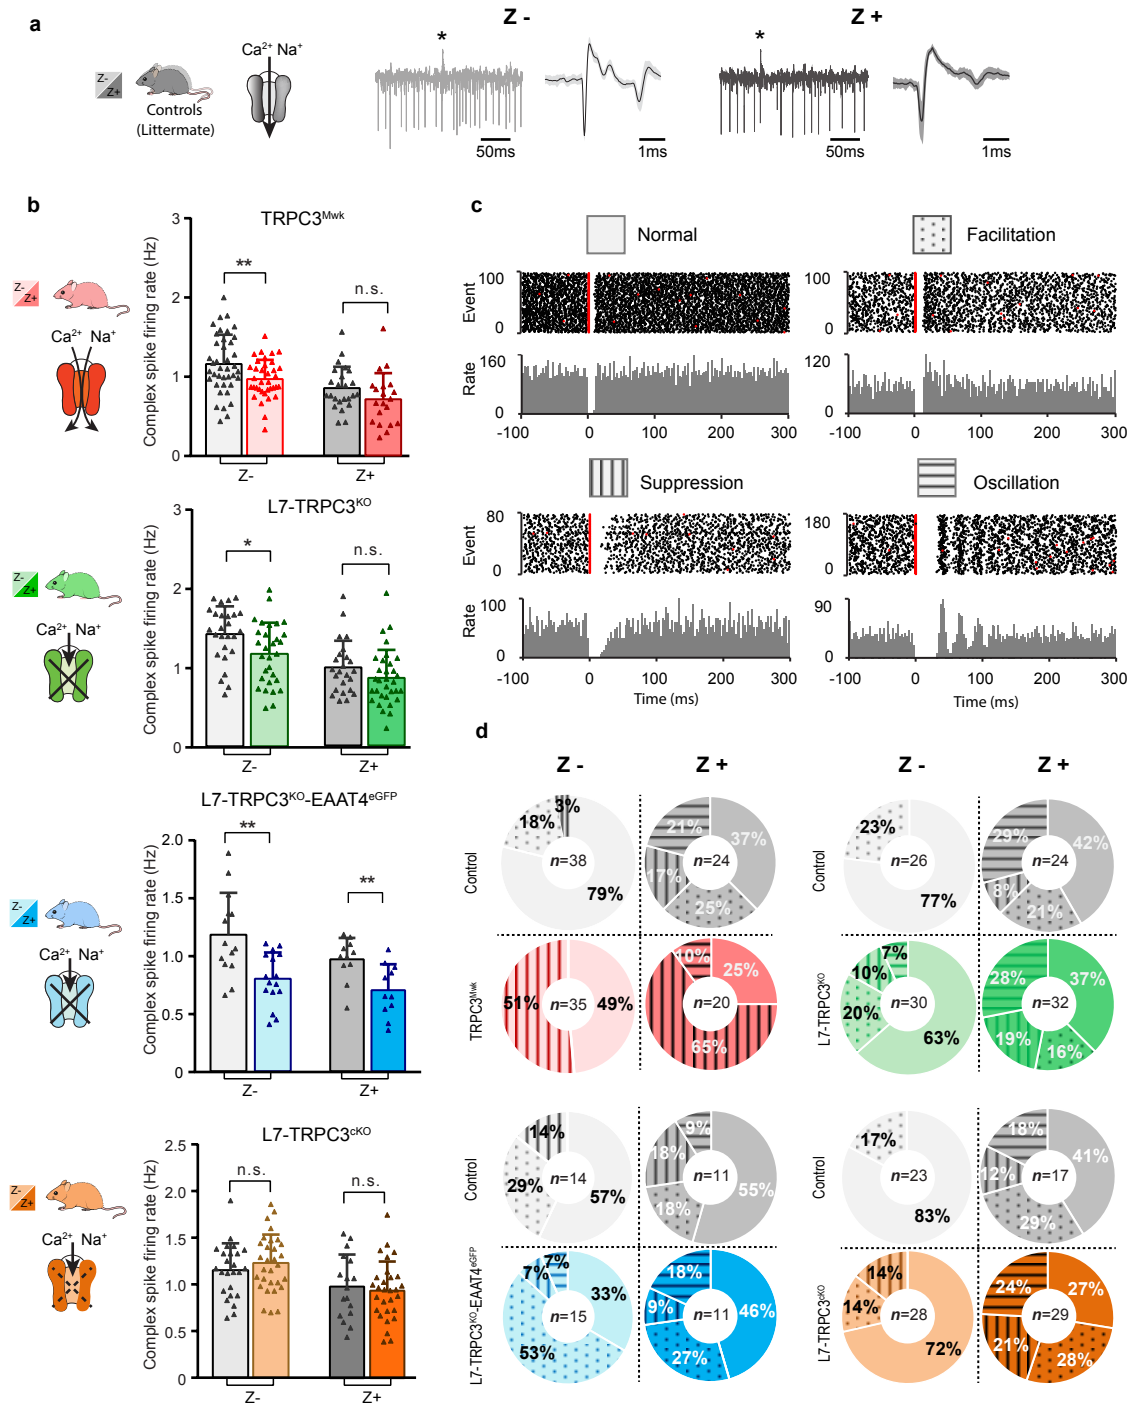

**Fig. 5**

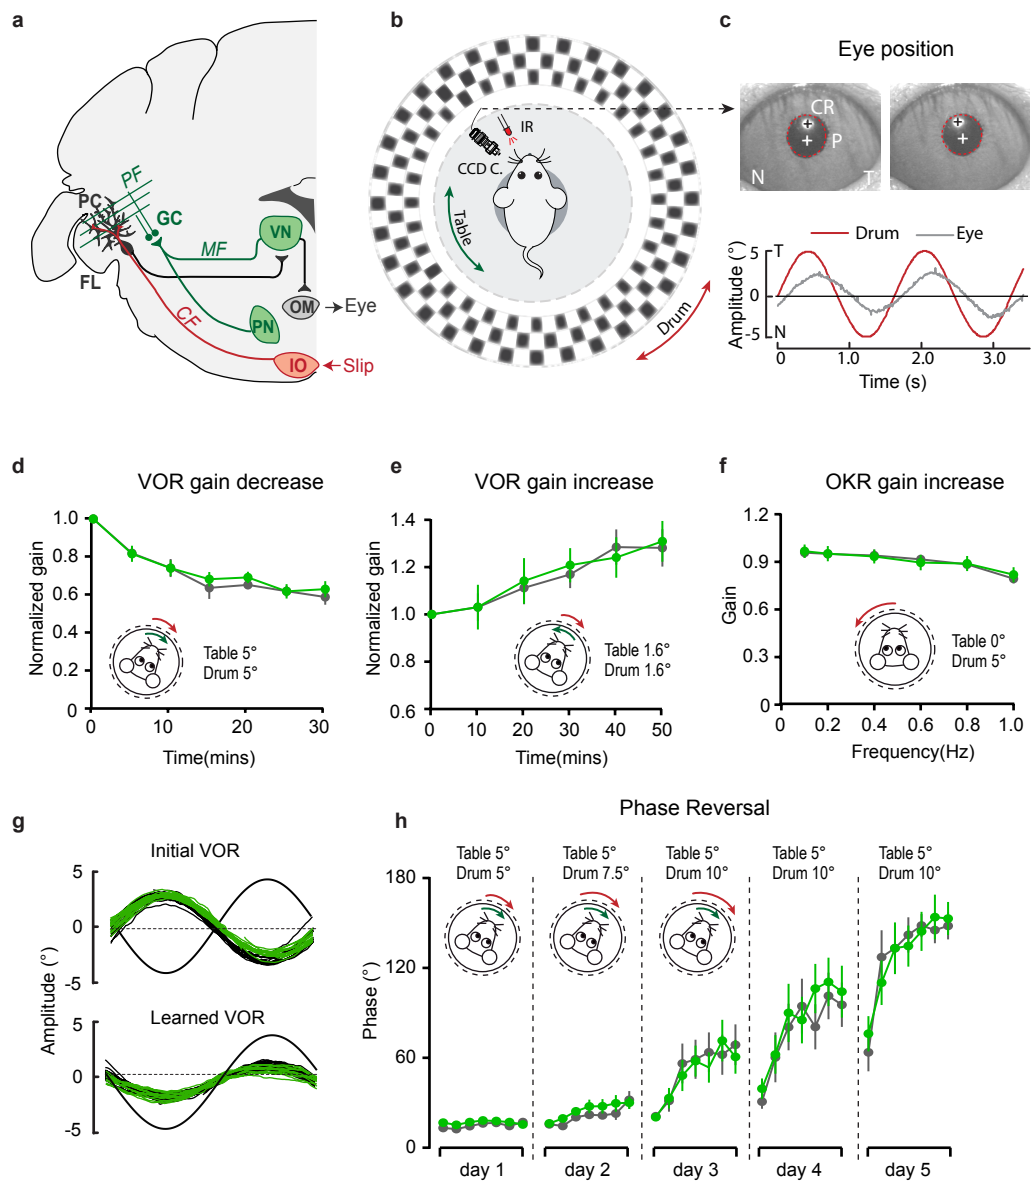

**Fig. 6**

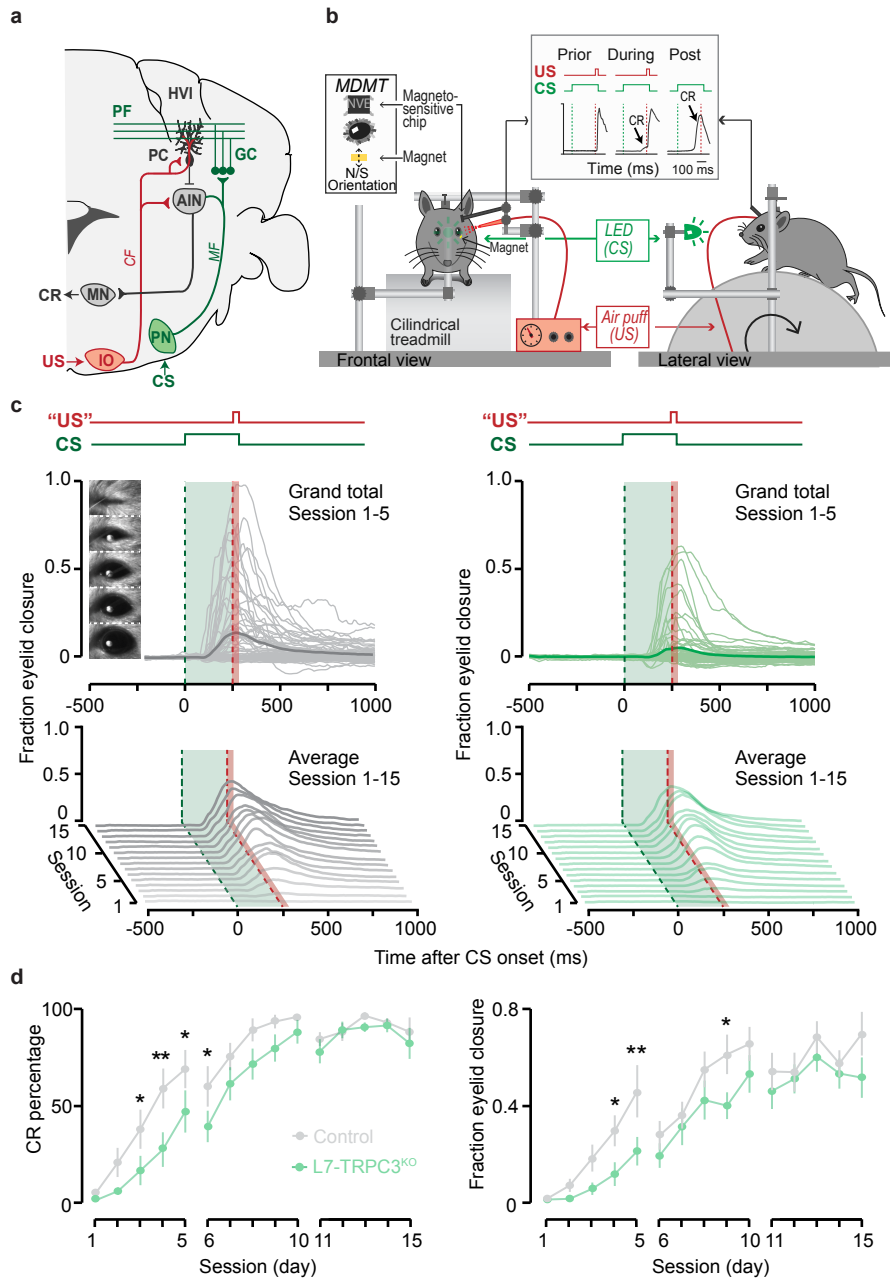

**Fig. 7**
